# Supplementary material for: Electrocatalyst decomposition pathways: torsional strain in a second sphere proton relay shuts off CO 2 RR in a Re(2,2′-bipyridyl)(CO) 3 X type electrocatalyst
Source: Royal Society of Chemistry journal article supplement (doi:10.1039/d2dt02876j), 2022-01-01
Supplement: d2dt02876j1.pdf [file d2dt02876j1.pdf]

## Supporting Information

### Electrocatalyst decomposition pathways: torsional strain in a second sphere proton relay shuts off CO<sub>2</sub>RR in a Re(2,2'-bipyridyl)(CO)<sub>3</sub>X type electrocatalyst

Zachary Dubrawski, Chia Yun Chang, Cody Carr, Benjamin S Gelfand and Warren E. Piers\*

Department of Chemistry, University of Calgary, 2500 University Drive NW, Calgary, AB, T2N 1N4,  
Canada

\*Corresponding authors:

[wpiers@ucalgary.ca](mailto:wpiers@ucalgary.ca)

#### Contents

|                                                                        |    |
|------------------------------------------------------------------------|----|
| General Considerations .....                                           | 1  |
| Synthesis of Compounds .....                                           | 5  |
| NMR Spectra .....                                                      | 11 |
| Spectroelectrochemistry Data .....                                     | 21 |
| IR Spectra .....                                                       | 24 |
| Electrochemistry .....                                                 | 27 |
| UV-Vis Spectra .....                                                   | 32 |
| Supplementary Crystal Structures and X-ray Crystallography Tables..... | 35 |
| References .....                                                       | 39 |

## General Considerations

### Materials and Reagents

Air and moisture-sensitive reactions were carried out under an argon atmosphere using standard schlenk line techniques. Tetrahydrofuran was dried over activated alumina using a solvent purification system and stored in 500 mL thick-walled glass vessels over sodium/benzophenone ketal. Acetonitrile was dried over  $\text{CaH}_2$ . All solvents were degassed and vacuum distilled prior to use. 2-amino-3-bromobenzaldehyde was purchased from Combi-Blocks and used without further purification.  $\text{Re}(\text{CO})_5\text{Cl}$  was purchased from Sigma-Aldrich, stored under inert atmosphere in an Ar filled glovebox and used without further purification. Decamethylcobaltocene and potassium tert-butoxide was purchased from Sigma-Aldrich and sublimed prior to use.  $\text{KC}_8$  was prepared according to literature procedures.<sup>1</sup> **1** was purchased from Combi-Blocks and used as received. **i** and **ii** were prepared according to literature reports with some modifications detailed below.<sup>2,3</sup>  $\text{Re}(\text{bpy})(\text{CO})_3\text{Cl}$  synthesized according to literature procedure.<sup>4</sup>

### Electrochemistry

All electrochemical measurements were performed on a CHI 660D or 660E potentiostat at room temperature ( $20 \pm 2^\circ\text{C}$ ) in a three-electrode configuration. A carbon-based working, Pt mesh counter and Ag/AgCl wire reference electrode were used in dry dimethylformamide (DMF) containing 0.1 M TBAPF<sub>6</sub> (Sigma, electrochemical grade,  $\geq 99.0\%$ ) as supporting electrolyte and 1.0 mM analyte (for experiments with Re complex in solution). The Ag/AgCl wire was immersed into a glass tube filled with electrolyte solution and separated *via* a CoralPor frit from the analyte-containing solution. Ferrocene (Fc) was added as an internal standard at the end of each measurement, and potentials were referenced against the  $\text{Fc}^+/\text{Fc}$  redox couple (0 V). Cyclic voltammograms were recorded in a glovebox under Ar atmosphere (unless otherwise noted), and, in case of  $\text{CO}_2$  atmosphere, solutions were purged with  $\text{CO}_2$  (Air liquide, Research grade) for 10 min. Redox potentials are reported as peak potential of the cathodic wave ( $E_{\text{pc}}$ ) except when otherwise specified. Controlled potential electrolysis (CPE) was performed in a two-compartment cell (Re complex in solution) with an ultra-fine frit separating the two compartments. The Pt mesh counter electrode was placed into the anodic compartment filled with electrolyte solution (8 mL DMF/0.1 M TBAPF<sub>6</sub>). A glassy carbon plate working (2 cm depth immersed into solution) and the Ag/AgCl reference electrode were placed into the cathodic compartment containing the analyte solution (8 mL, 0.5 mM catalyst, DMF/0.1 M TBAPF<sub>6</sub>). After sealing the cells with rubber septa, solutions were purged with  $\text{CO}_2$  for 15 min. The remaining headspace was regularly sampled (50  $\mu\text{L}$ ) using a gastight Hamilton syringe and analysed via gas chromatography. After CPE the electrodes were tested for electrochemically active precipitates with the rinse test.

### Electrode preparation

Glassy carbon disks (3 mm, PEEK-encased, BaSi) and glassy carbon plates (Alfa Aesar, type 1, thickness = 2 mm) were polished before each experiments using 0.3  $\mu\text{m}$  alumina paste on a microfiber cloth. For solution experiments, the glassy carbon disks were cleaned between each cyclic voltammetry run. CPE GC plates were attached to a steel rod with electrically conductive Cu tape, wrapped in Teflon tape and then Parafilm. Acceptable conductivity through the prepared electrode was confirmed before starting a CPE experiment

### Gas chromatography

The gas chromatograph (GC, Agilent 7890B Series) was equipped with a PoraPlot Q and PLOT molecular sieve (5 Å) column (oven temperature 60-120  $^\circ\text{C}$ ) and a VICI pulse discharge Helium ionization detector

(PDHID). Helium (5.0) was used as carrier gas at a flow rate of approx. 5 mL min<sup>-1</sup>. The GC was calibrated in regular intervals with known CO<sub>2</sub>-balanced gas mixtures containing H<sub>2</sub> and CO. All experiments were performed at least in triplicate (unless otherwise noted). See below for statistical analysis.

### Spectroelectrochemistry

Experiments were conducted using a LabOmak SEC OTTLE cell fitted with CaF<sub>2</sub> windows, Pt working and counter electrode, and Ag wire pseudo-reference electrode which was reference to an external sample of Fc<sup>+</sup>/Fc. The optical pathlength is 0.2mm which was filled with 0.3M TBAPF<sub>6</sub> DMF solutions as background. The background and analyte solutions were prepared in an argon filled glovebox. The cell was also assembled in the glovebox and CVs taken of background DMF samples show no O<sub>2</sub> reduction present. CO<sub>2</sub> sparged solutions were prepared by bubbling the DMF solutions with anhydrous CO<sub>2</sub> and quickly added to the cell. Significant bubble formation in the window is observed with CO<sub>2</sub> sparged solutions.

### IR spectroscopy

Infrared spectra were recorded on an Agilent Cary 630 FT-IR spectrometer with a transmission setup (SEC and solution samples). A background of solvent was recorded prior to measuring the Re complex. Spectra were averaged over 145 scans with a resolution of 2 cm<sup>-1</sup>. Spectra were averaged over 64 scans with a resolution of 4 cm<sup>-1</sup> and processed using the OMNIC 9.2 software package provided with the instrument. A background scan was recorded before each sample scan.

### NMR spectroscopy

<sup>1</sup>H and <sup>13</sup>C NMR spectra were recorded on a Bruker AV-III 500 MHz or 600 MHz NMR spectrometer at room temperature (r.t.). The measurements were carried out in commercially available deuterated solvents. <sup>1</sup>H and <sup>13</sup>C NMR spectrometry chemical shifts were referenced to residual proteo-solvent resonances and naturally abundant <sup>13</sup>C NMR resonances for all deuterated solvents.

### X-Ray crystallography

Data were collected with Cu K $\alpha$  radiation on a Bruker Smart diffractometer equipped with an Apex II CCD detector, fixed-CHI goniometer, and sealed-tube (Cu) source. The crystal was kept at 173.0 K during data collection. Using Olex2,<sup>2</sup> the structure was solved with the ShelXT<sup>3</sup> structure solution program using Intrinsic Phasing and refined with the XL<sub>4</sub> refinement package using least squares minimization. Structures can be accessed from the accession numbers 2175393-2175398

### Other physical measurements

Elemental analyses and high-resolution mass spectra were obtained at the Instrumentation Facility in the Department of Chemistry, University of Calgary. Mass spectra were recorded in methanol (organic compounds) or acetonitrile (Re complex).

### pK<sub>a</sub> Determination

A 20 mL scintillation vial was charged with **1** in a quantity of fresh d<sub>6</sub>-DMSO. The solution was partitioned into NMR tubes and exposed to bases with known conjugate acid pK<sub>a</sub>. The bases and reported pK<sub>a</sub> are reported below. Reported pK<sub>a</sub>'s were found from the convenient tables made by Dr. Hans Reich which includes references found here. The NMR spectra of the resultant solutions is Fig S19

|                                                                 |
|-----------------------------------------------------------------|
| Table S1: The deprotonation of <b>1</b> with various weak bases |
|-----------------------------------------------------------------|

| Base             | Reported pK <sub>a</sub> in DMSO of conjugate acid | Rxn with <b>1</b> to generate deprotonated complex | Reference for pK <sub>a</sub> |
|------------------|----------------------------------------------------|----------------------------------------------------|-------------------------------|
| NaOAc            | 12.3                                               | Yes                                                | 5                             |
| NEt <sub>3</sub> | 9.0                                                | Yes                                                | 6,7                           |
| Proton Sponge    | 7.5                                                | Incomplete Reaction (see notes below)              | 8                             |
| Pyridine         | 3.4                                                | No                                                 | 9                             |

The reaction of **1** and proton sponge does not go to completion, rather two products and starting material are observed in solution. By NMR, one product is the deprotonated species and we presume the other to be the Proton Sponge adduct. This makes quantitation difficult as the species are not only in equilibrium with protonated/deprotonated products, but also adducts/dimers. Therefore, to hedge our bets, we report the pK<sub>a</sub> of **1** to be a range between trimethylamine (pK<sub>a</sub> = 9) and Proton Sponge (7.5) to avoid inaccuracies in our BDFE measurements. Despite this admittedly higher-than-reality pK<sub>a</sub>, the BDFE is still low enough to allow for spontaneous H<sub>2</sub> evolution observed in the synthesis of **2**.

The electrochemistry of **1** is performed in DMF and while not much variance in pK<sub>a</sub> should be expected between DMSO and DMF, the synthesis of **2** is performed in C<sub>6</sub>H<sub>6</sub> and as such, there could be a wide discrepancy in pK<sub>a</sub> values.<sup>10</sup> Unfortunately, the pK<sub>a</sub> of simple acids are not well studied in non-polar solvents. There are some reports of aryl N-H pK<sub>a</sub> determination in n-heptane, which may be used as a model for C<sub>6</sub>H<sub>6</sub> in the absence of better alternatives. In heptane, the N-H pK<sub>a</sub> were found to be far more acidic than in DMSO, with an approximate change of -4 pK<sub>a</sub> units.<sup>11,12</sup> Accordingly, we would expect the BDFE of **1** to fall with the increase in acidity, perhaps lowering the estimated BDFE even further. We acknowledge that the pK<sub>a</sub> estimated above is for **1** and not the singly reduced species however, we anticipate that while the pK<sub>a</sub> should rise due to unfavourable charge accumulation, it should still be within a range to accommodate loss of the H· radical.

## Equations

Experiments performed in triplicate (unless otherwise noted) with average values and standard deviations reported.

$$x_u = \sum_i \frac{x_i}{n} \quad \sigma = \sqrt{\sum_i \frac{(x_i - x_u)^2}{(n-1)}}$$

Where x<sub>u</sub> = unweighted mean value, x<sub>i</sub> = observations, n = number of observations and σ = standard deviation

### Faradaic Efficiency

$$FE(\%) = \frac{n(CO)_{meas}}{n(CO)_{calc}} \cdot 100\% = \frac{n(CO)_{meas}}{\frac{Q}{zF}} \cdot 100\%$$

Where Q = charge passed over course of CPE experiment, z = # electrons required for reduction to CO = 2, and F = Faradaic Constant

### Determination of *k<sub>obs</sub>* using *i<sub>c</sub>/i<sub>p</sub>* analysis<sup>13</sup>

$$\frac{i_{cat}}{i_p} = 2.2406 \sqrt{\frac{RT}{nFv}} n' k_{obs}$$

Where  $i_{cat}$  = peak current of redox wave under catalytic conditions,  $i_p$  = peak current of redox wave,  $R$  = universal gas constant,  $T$  = temperature,  $n$  = # electrons transferred,  $F$  = Faradaic constant,  $v$  = scan rate,  $n'$  = # of catalyst molecules required per turnover (presumed to = 1),  $k_{obs}$  = observed rate constant as defined in reference S\*\*.

Bordwell Equation for Bond Dissociation Free Energy<sup>14</sup>

$$BDFE_{solv}(X-H) = 1.37pK_a + 23.06E^o + C_{G,sol}$$

Where  $pK_a$  is for the X-H bond of interest,  $E^o$  is the standard potential of the analyte (the average of anodic and cathodic peaks in CV for the redox event, defined as  $E_{1/2}$ , is typically used as a good measure of  $E^o$ ), and  $C_{G,solv}$  is a solvent dependant constant ( $C_{G,DMF} = 69.7$  kcal/mol)

## Synthesis of Compounds

### Synthesis of 2-pyridyl-8-bromoquinoline, **i**

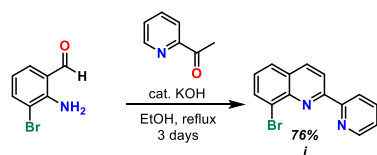

Synthesis has been adapted from Thummel et al. 5.001 g (1 eq., 0.025 mol) 2-amino-3-bromobenzaldehyde, 3.789 g acetylpyridine (1.3 eq, 0.031 mol) and 0.778 g potassium hydroxide (0.5 eq., 0.014 mol) was combined in 200 mL 90% ethanol. The suspension was heated to reflux for 3 days. The reddish-brown solution was cooled to room temperature and the solvent removed under reduced pressure. The oily, extremely sticky solid material was transferred to a sublimation apparatus and **i** readily sublimed at 100°C at 30 mTorr pressure. Analytically pure **i** was obtained from the cold finger as a white, free-flowing powder. NMR spectra matched previous reports Final yield = 5.41 g, 0.018 mol, 76%

$^1\text{H}$  NMR (500 MHz,  $\text{CDCl}_3$ )  $\delta$  8.86 (d,  $J$  = 8.0, 1H), 8.73 (d,  $J$  = 4.9 Hz, 1H), 8.66 (d,  $J$  = 8.6 Hz, 1H), 8.28 (d,  $J$  = 8.6 Hz, 1H), 8.07 (dd,  $J$  = 7.4, 1.3 Hz, 1H), 7.91 (td,  $J$  = 7.7, 1.8 Hz, 1H), 7.82 (dd,  $J$  = 8.1, 1.3 Hz, 1H), 7.43 – 7.35 (m, 2H).

### Synthesis of AbP, **ii**

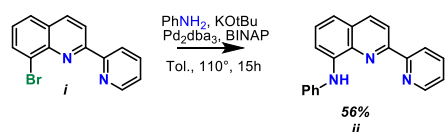

0.500 g **i** (1 eq., 0.0017 mol), 0.056 g  $\text{Pd}_2\text{dba}_3$  (3%, 0.03 eq,  $6.1 \times 10^{-5}$  mol), 0.076 g rac-BINAP (7%, 0.07 eq,  $1.2 \times 10^{-4}$  mol), 0.235 KOtBu (1.2 eq, 0.0021 mol), 0.195 g aniline (1.2 eq. 0.021 mol) were combined in a thick-walled glass bomb along with 15 mL dry toluene. The solution was heated to 110°C overnight. After cooling to room temp, the mixture was diluted with DCM and flashed through a silica plug with more DCM to remove the bulk of palladium. The solvent was removed to give a brown oil, which was purified by flash column chromatography (3:2 hexane:  $\text{Et}_2\text{O}$ ) to give a bright yellow solid. This solid was treated with the silica adsorbed Pd-scavenging agent, SiliaMet-Thiol, according to manufacturer's instructions (room temperature mix in DCM overnight). Finally, **3** was recrystallized from hot MeOH. NMR Spectra match previous reports. Final yield = 0.292 g, 0.00098 mol, 56%

$^1\text{H}$  NMR (500 MHz,  $\text{CDCl}_3$ )  $\delta$  8.75 (d,  $J$  = 4.6 Hz, 1H), 8.64 (d  $J$  = 8.0 Hz, 1H), 8.60 (d,  $J$  = 8.6 Hz, 1H), 8.37 (bs, 1H), 8.26 (d,  $J$  = 8.6 Hz, 1H), 7.89 (td,  $J$  = 7.7, 1.8 Hz, 1H), 7.53 – 7.32 (m, 7H), 7.09 (tt,  $J$  = 7.2, 1.3 Hz, 1H).

UV-Vis<sub>DMF</sub>:  $\lambda_{\text{max}}$  = 410 nm ( $520 \text{ M}^{-1}\text{cm}^{-1}$ )

## Synthesis of $\text{Re}(\text{AbP})(\text{CO})_3\text{Cl}$ , **1**

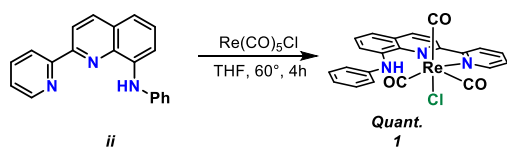

In an argon filled glovebox, 150 mg **ii** ( $5.0 \times 10^{-4}$  mol, 1.0 eq) and 174 mg  $\text{Re}(\text{CO})_5\text{Cl}$  ( $4.8 \times 10^{-4}$  mol, 0.95 eq) were combined with 30 mL anhydrous THF in a 100 mL Schlenk flask with a teflon Kontes tap. The solution was heated to reflux for 4 hours before cooling to room temperature and opening to atmosphere. The solvent was removed under reduced pressure and the purple solid was triturated with hexane to remove excess **ii**. The compound can be recrystallized from  $\text{Et}_2\text{O}$ :pentane. Final yield = 0.289 g, mol, 100% based on Re starting material used.

$^1\text{H}$  NMR:  $^1\text{H}$  NMR (500 MHz,  $\text{CDCl}_3$ )  $\delta$  9.18 (d,  $J = 5.5$  Hz, 1H), 8.75 (s, 1H), 8.52 (d,  $J = 8.6$  Hz, 1H), 8.18 – 8.12 (m, 2H), 8.07 (d,  $J = 8.6$  Hz, 1H), 8.00 (dd,  $J = 8.1, 1.3$  Hz, 1H), 7.65 (ddd,  $J = 7.2, 5.4, 1.9$  Hz, 1H), 7.57 (t,  $J = 8.0$  Hz, 1H), 7.55 – 7.49 (m, 2H), 7.43 (t,  $J = 7.9$  Hz, 2H), 7.37 (dd,  $J = 7.9, 1.3$  Hz, 1H), 7.13 (t,  $J = 8.1$  Hz, 1H).

$^{13}\text{C}$  NMR (126 MHz,  $\text{CDCl}_3$ )  $\delta$  195.13, 193.96, 188.05, 156.58, 156.27, 152.75, 140.92, 140.70, 140.21, 138.90, 138.12, 130.32, 129.70, 128.65, 126.25, 123.71, 122.99, 121.99, 117.63, 115.68, 110.97.

IR (KBr Pellet):  $\nu(\text{CO}) = 2022, 1916, 1886$ .  $\nu(\text{N-H}) = 3270$

IR soln:  $\nu(\text{CO}) = 2022, 1918, 1893$ .  $\nu(\text{N-H})$  in DCM = 3275

UV-Vis $_{\text{DMSO}}$ :  $\lambda_{\text{max}} = 514$  nm ( $2710 \text{ M}^{-1}\text{cm}^{-1}$ )

ESI-Mass Spec: (M-Cl+H) calc  $m/z$ : 568.06654, expt  $m/z$ : 568.06902

EA: Expected: C – 45.81, H – 2.51, N – 6.97. Found C – 45.36, H – 2.36, N – 6.64

## Synthesis of $[\text{Cp}^*_2\text{Co}] [\text{Re}(\text{AbP})(\text{CO})_3]_2$ , **2**

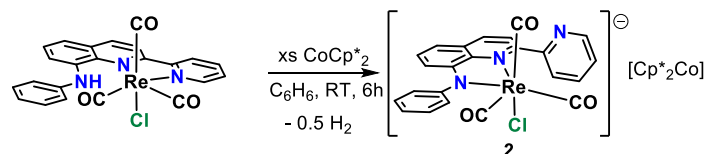

In an argon filled glovebox, 41 mg ( $1.2 \times 10^{-4}$  mol, 3 eq.)  $\text{Cp}^*_2\text{Co}$  was added to a rapidly stirring suspension of **1** (25 mg,  $4.14 \times 10^{-5}$  mol) in 10 mL anhydrous benzene in one portion. The colour slowly changed over time with formation of a purple precipitate. After 6 hours, the precipitate was filtered off with a glass fritted funnel and washed with copious amounts of  $\text{C}_6\text{H}_6$  to remove unreacted **1** and  $\text{Cp}^*_2\text{Co}$ . The purple solid was then washed with pentane and dried under reduced pressure to yield **2**. Final yield = 24 mg, 89%. The solid can be recrystallized from layered DCM:pentane.

$^1\text{H}$  NMR (500 MHz,  $\text{CD}_2\text{Cl}_2$ )  $\delta$  8.72 (d,  $J$  = 4.8 Hz, 1H), 8.06 (d,  $J$  = 8.6 Hz, 1H), 8.00 (d,  $J$  = 6.6 Hz, 1H), 7.83 (t,  $J$  = 7.7 Hz, 1H), 7.49 (d,  $J$  = 8.4 Hz, 1H), 7.43 – 7.34 (m, 4H), 7.26 (t,  $J$  = 7.7 Hz, 1H), 7.19 (d,  $J$  = 7.0 Hz, 1H), 7.08 (t,  $J$  = 7.9 Hz, 1H), 7.02 (t,  $J$  = 6.5 Hz, 1H), 6.52 (d,  $J$  = 7.1 Hz, 1H), 6.44 (d,  $J$  = 8.3 Hz, 1H), 1.72 (s, 30H).

$^{13}\text{C}$  NMR could not be obtained. Combination of poor solubility in solvents and the decomposition of **2** into **4** (which is accelerated in some solvents such as ACN) prevented accurate  $^{13}\text{C}$  analysis within reasonable timescales.

IR (KBr pellet):  $\nu(\text{CO})$  = 1996, 1884, 1855

UV-Vis<sub>DMF</sub>:  $\lambda$  = 429, 554 nm

EA: Expected: C – 55.45, H – 4.76, N – 4.51. Found C – 55.11, H – 4.27, N – 4.88

#### *Experiment to detect and quantify H<sub>2</sub> production from the synthesis of **2***

Into a 25 mL 2-neck round bottom flask equipped with a Kontes tap, a Teflon coated stirbar and a rubber septa (total volume  $29.3452 \pm 0.002$  mL with adaptors etc.) was added 25 mg **1**. 41 mg  $\text{Cp}^*\text{Co}$  (3 eq,) dissolved in 7 mL anhydrous  $\text{C}_6\text{H}_6$  was transferred via syringe under an Ar atmosphere. 50  $\mu\text{L}$  headspace aliquots were taken for GC-PDHID analysis and quantification. The experiment was repeated in triplicate to yield  $0.24 \text{ eq} \pm 0.09 \text{ H}_2$ .

Leaks in the reaction flask joints/septa,  $\text{H}^\bullet$  consumption by adventitious acceptors ( $\text{H}_2\text{O}/\text{DCM}/\text{ligand}$  decomposition etc), or  $\text{H}_2$  remaining dissolved in solution could explain this low quantified yield on such small scales

#### **Procedure for the Chemical Reduction of **1** with 2.2 eq. $\text{KC}_8$**

In an argon filled glovebox, a 20 mL scintillation vial was charged with 20 mg **1** ( $3.3\text{e-}5$  mol) and 5 mL anhydrous THF. 5 mg (1.1 eq.) freshly prepared  $\text{KC}_8$  was slowly added at room temperature. The suspension was allowed to stir for 1h before filtration through a 0.2  $\mu\text{m}$  PTFE syringe filter to yield a deep purple solution. The solvent was removed under vacuum and the solid taken up in  $\text{C}_6\text{D}_6$  for NMR analysis (Fig S\*\*). The NMR sample was removed from the J-Young tube and layered with pentane, from which grew crystals of the dearomatized complex reported in the manuscript.

#### **Synthesis of $[\text{Re}(\text{AbP})(\text{CO})_3]_2$ , **4****

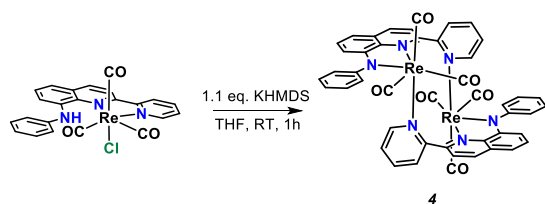

In an argon filled glovebox, 45 mg **1** ( $7.46\text{e-}5$  mol) was taken up in 5 mL anhydrous THF. A solution of 17 mg ( $8.52\text{e-}5$  mol, 1.2 eq.) KHMDS was made up in 1 mL anhydrous THF and added dropwise to the rapidly stirring **1** solution with an immediate colour change to dark blue. The solution was stirred for 1 hour before filtering through a 0.2  $\mu\text{m}$  PTFE syringe filter using extra THF to wash through. The solvent was removed under reduced pressure and the dark blue solid was triturated with copious amounts of

anhydrous hexanes to remove excess KHMDS. The solid was recrystallized from layering DCM and pentane. Final yield = 0.038 g, 92%. While the complex was found to be air stable, it was stored and manipulated for further reactivity entirely within an argon filled glovebox.

$^1\text{H}$  NMR (500 MHz,  $\text{CD}_2\text{Cl}_2$ )  $\delta$  9.58 (d,  $J$  = 6.0 Hz, 1H), 8.15 (d,  $J$  = 8.5 Hz, 1H), 7.83 (td,  $J$  = 7.6, 1.6 Hz, 1H), 7.49 – 7.31 (m, 7H), 7.13 (ddd,  $J$  = 8.5, 6.8, 1.9 Hz, 1H), 7.05 (dd,  $J$  = 8.2, 1.1 Hz, 1H), 6.85 – 6.80 (d, 1H,  $J$  = 7.6 Hz),

$^{13}\text{C}$  NMR (126 MHz,  $\text{CD}_2\text{Cl}_2$ )  $\delta$  198.97, 195.63, 192.66, 164.00, 162.20, 159.01, 158.83, 155.65, 151.84, 144.47, 138.75, 138.45, 131.90, 130.77, 129.87, 129.15, 127.46, 126.42, 126.14, 124.11, 123.48, 112.56, 110.20.

IR (KBr pellet):  $\nu(\text{CO})$  = 2008, 1919, 1872

UV-Vis $_{\text{DMSO}}$ :  $\lambda$  = 410, 580 nm

EA: Expected: C – 48.76, H – 2.49, N – 7.42. Found C – 49.03, H – 3.01, N – 6.98

### Synthesis of $[\text{Re}(\text{AbP})(\text{CO})_3\text{DMAP}]$ , **5**

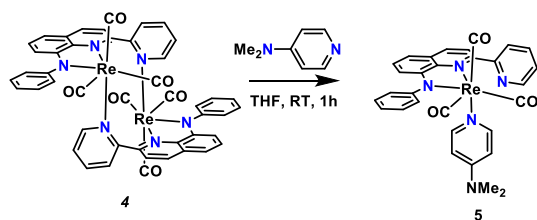

In an argon filled glovebox, to a rapidly stirring solution of **4** (57 mg, 5.03e-5 mol) in ~5 mL anhydrous THF, 12 mg (1.0e-4 mol, 2 eq.) of 4-dimethylaminopyridine (DMAP) was added in one portion with immediate colour change to a vibrant blue. The solution was stirred for 1 hour before filtering through a 0.2  $\mu\text{m}$  PTFE syringe filter. The solvent was removed under reduced pressure and the blue solid was triturated with copious amounts of pentane to remove excess DMAP. The solid was recrystallized from layered THF and pentane. Final yield = 63 mg, 95%. While the complex was found to be air stable, it was stored and manipulated for further reactivity entirely within an argon filled glovebox.

$^1\text{H}$  NMR (500 MHz,  $\text{CD}_2\text{Cl}_2$ )  $\delta$  8.74 (d,  $J$  = 4.8 Hz, 1H), 8.12 (d,  $J$  = 8.5 Hz, 1H), 7.89 (d,  $J$  = 7.2 Hz, 1H), 7.86 (td,  $J$  = 7.7, 1.8 Hz, 1H), 7.56 – 7.47 (m, 3H), 7.43 – 7.36 (m, 4H), 7.13 (t,  $J$  = 8.0 Hz, 1H), 7.07 (tt,  $J$  = 7.0, 1.6 Hz, 1H), 6.80 (dd,  $J$  = 8.3, 1.1 Hz, 1H), 6.61 (d,  $J$  = 7.6 Hz, 1H), 6.27 (d,  $J$  = 7.3 Hz, 1H), 2.91 (s, 6H)

$^{13}\text{C}$  NMR (126 MHz,  $\text{CD}_2\text{Cl}_2$ )  $\delta$  197.78, 194.67, 159.13, 157.75, 156.61, 154.57, 153.64, 150.63, 148.22, 143.58, 137.44, 135.28, 130.29, 128.77, 128.58, 127.71, 126.05, 125.36, 123.52, 122.22, 121.96, 108.90, 106.71, 106.48, 67.17, 53.29, 53.08, 52.95, 52.86, 52.64, 52.43, 38.30.

IR (KBr pellet):  $\nu(\text{CO})$  = 2003, 1892, 1875

UV-Vis $_{\text{DMF}}$ :  $\lambda_{\text{max}}$  = 585 nm

EA: Expected: C – 52.32, H – 3.51, N – 10.17. Found C – 51.99, H – 3.68, N – 10.56

### Synthesis of A<sup>Me</sup>bP, **iii**

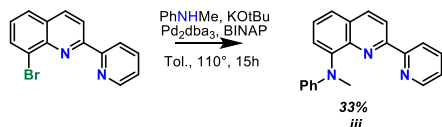

0.500 g **i** (1 eq., 0.0017 mol), 0.056 g Pd<sub>2</sub>dba<sub>3</sub> (3%, 0.03 eq, 6.1e-5 mol), 0.076 g rac-BINAP (7%, 0.07 eq, 12e-4 mol), 0.235 KOtBu (1.2 eq, 0.0021 mol), 0.195 g N-methyl aniline (1.2 eq, 0.021 mol) were combined in a thick-walled glass bomb along with 15 mL dry toluene. The solution was heated to 110°C overnight. Curiously the compound was found to decompose on silica (confirmed via 2D TLC) despite the confirmed stability of **ii** to the same conditions. After cooling to room temp, the reaction solution was diluted with CHCl<sub>3</sub> and washed with 3x 50mL portions of DI water. The organic phase was then extracted with 5x 50mL, pH = 1 water. The pink aqueous phase was rebaseified to pH 13 and extracted with 3x 50 mL portions of CHCl<sub>3</sub>. The organic phase was washed with 1x 50 mL brine and dried with Na<sub>2</sub>SO<sub>4</sub>, and the solvent removed under reduced pressure to yield a bright yellow powder. This was then recrystallized from hot MeOH twice before metalation. Final yield = 0.13 g, 33%

<sup>1</sup>H NMR (500 MHz, CDCl<sub>3</sub>) δ 8.65 (ddd, *J* = 4.8, 1.9, 0.9 Hz, 1H), 8.53 (d, *J* = 8.6 Hz, 1H), 8.28 (d, *J* = 8.6 Hz, 1H), 7.91 (dt, *J* = 7.9, 1.1 Hz, 1H), 7.66 (td, *J* = 7.8, 1.7 Hz, 2H), 7.61 (dd, *J* = 7.5, 1.4 Hz, 1H), 7.54 (t, *J* = 7.7 Hz, 1H), 7.29 – 7.25 (m, 1H), 7.24 – 7.18 (m, 2H), 6.92 – 6.86 (m, 2H), 6.85 – 6.79 (m, 1H), 3.61 (s, 3H).

<sup>13</sup>C NMR (126 MHz, CDCl<sub>3</sub>) δ 156.63, 155.42, 152.93, 148.47, 147.39, 141.30, 140.06, 137.21, 136.49, 128.88, 128.48, 128.30, 127.02, 124.74, 124.40, 121.93, 121.69, 120.13, 119.03, 115.95, 107.46, 76.73, 76.47, 76.22, 20.82.

UV-Vis<sub>DMF</sub>: λ<sub>max</sub> = 410 nm (522 M<sup>-1</sup>cm<sup>-1</sup>)

EA: Expected: C – 81.00, H – 5.50, N – 13.49. Found C – 81.29, H – 6.11, N – 12.94

### Synthesis of Re(AbP)(CO)<sub>3</sub>Cl, **6**

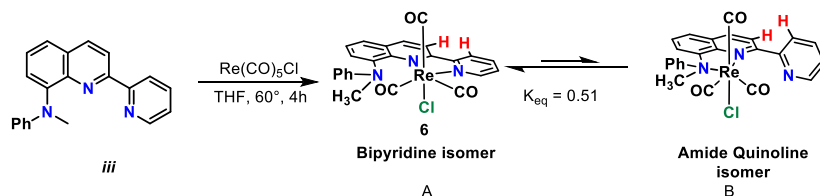

In an argon filled glovebox, 200 mg **iii** (6.4e-4 mol, 1.0 eq) and 220 mg Re(CO)<sub>5</sub>Cl (6.1e-4 mol, 0.95 eq) were combined with 30 mL anhydrous THF in a 100 mL Schlenk flask with a teflon Kontes tap. The solution was heated to reflux for 4 hours before cooling to room temperature and opening to atmosphere. The solvent was removed under reduced pressure and the purple solid was triturated with hexane to remove excess **iii**. Final yield = 0.365 g, 100% based on Re starting material used.

$^1\text{H}$  NMR (500 MHz,  $\text{CDCl}_3$ )  $\delta$  9.16 (d,  $J = 5.3$  Hz, 0.5H), 8.99 (dd,  $J = 5.5, 1.6$  Hz, 1H), 8.57 (d,  $J = 8.5$  Hz, 1H), 8.25 (d,  $J = 8.1$  Hz, 1H), 8.18 (d,  $J = 8.1$  Hz, 1H), 8.16 – 7.97 (m, 4H), 7.87 – 7.75 (m, 3H), 7.58 – 7.52 (m, 1H), 7.50 (d,  $J = 8.2$  Hz, 1H), 7.44 (ddd,  $J = 7.3, 4.4, 1.3$  Hz, 1H), 7.42 – 7.34 (m, 1H), 6.91 – 6.84 (m, 2H), 6.63 (t,  $J = 7.2$  Hz, 1H), 6.02 (d,  $J = 8.3$  Hz, 2H), 3.90 (s, 3H), 2.96 (s, 2H).

$^{13}\text{C}$  NMR (126 MHz,  $\text{CDCl}_3$ )  $\delta$  196.73, 196.29, 196.01, 195.09, 190.69, 189.79, 159.50, 159.42, 157.53, 157.04, 152.72, 152.56, 148.54, 147.84, 146.42, 146.18, 145.42, 144.49, 141.59, 141.17, 138.28, 138.17, 130.97, 129.62, 129.09, 128.65, 128.47, 128.07, 128.03, 127.84, 127.65, 127.60, 126.28, 125.37, 125.30, 124.49, 124.30, 124.25, 123.81, 123.55, 122.98, 121.98, 120.60, 119.12, 118.89, 118.77, 117.99, 115.73, 115.17, 110.96, 76.70, 76.65, 76.45, 76.19, 42.15, 42.08

IR<sub>KBr</sub> :  $\nu(\text{CO}) = 2016, 1919, 1872$

IR soln<sub>DMF</sub>:  $\nu(\text{CO}) = 2022, 1918, 1893$

UV-Vis<sub>DMSO</sub>:  $\lambda_{\text{max}} = 432, 517$  (shoulder) nm

ESI-Mass Spec: (M-Cl+H) calc  $m/z$ : 568.06654, expt  $m/z$ : 568.06902

EA: Expected: C – 46.71, H – 2.78, N – 6.81. Found C – 46.69, H – 2.88, N – 6.29

## NMR Spectra

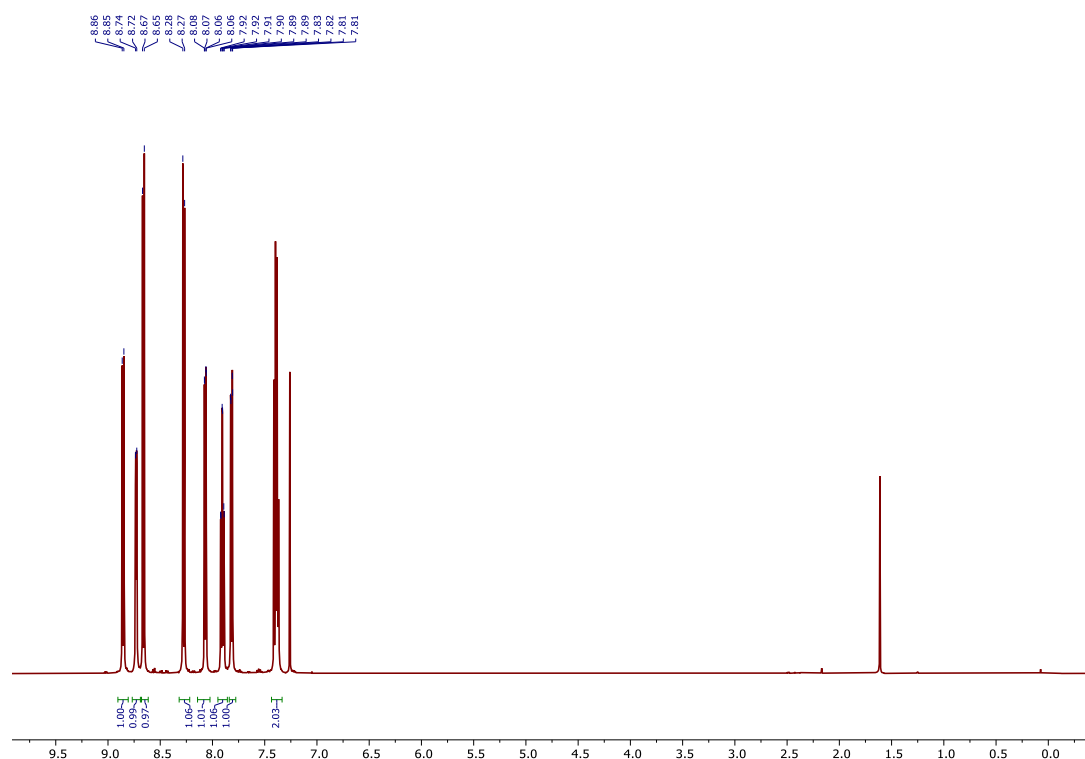

Fig S1: <sup>1</sup>H NMR spectrum of **i**, CDCl<sub>3</sub>

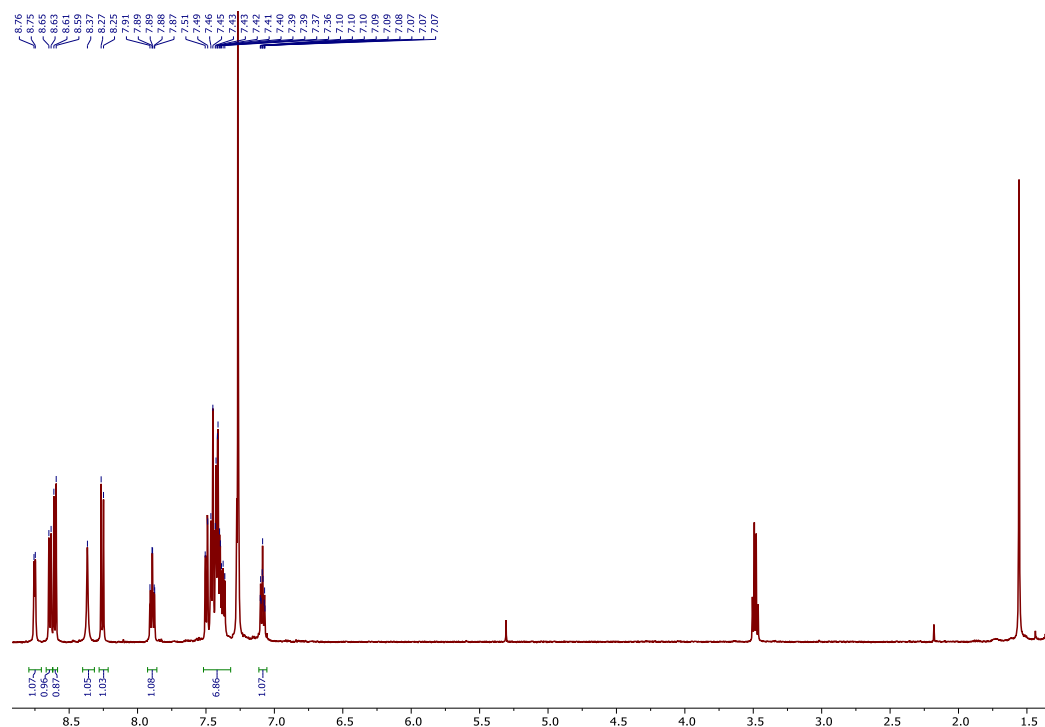

Fig S2: <sup>1</sup>H NMR spectrum of **iii**, CDCl<sub>3</sub>

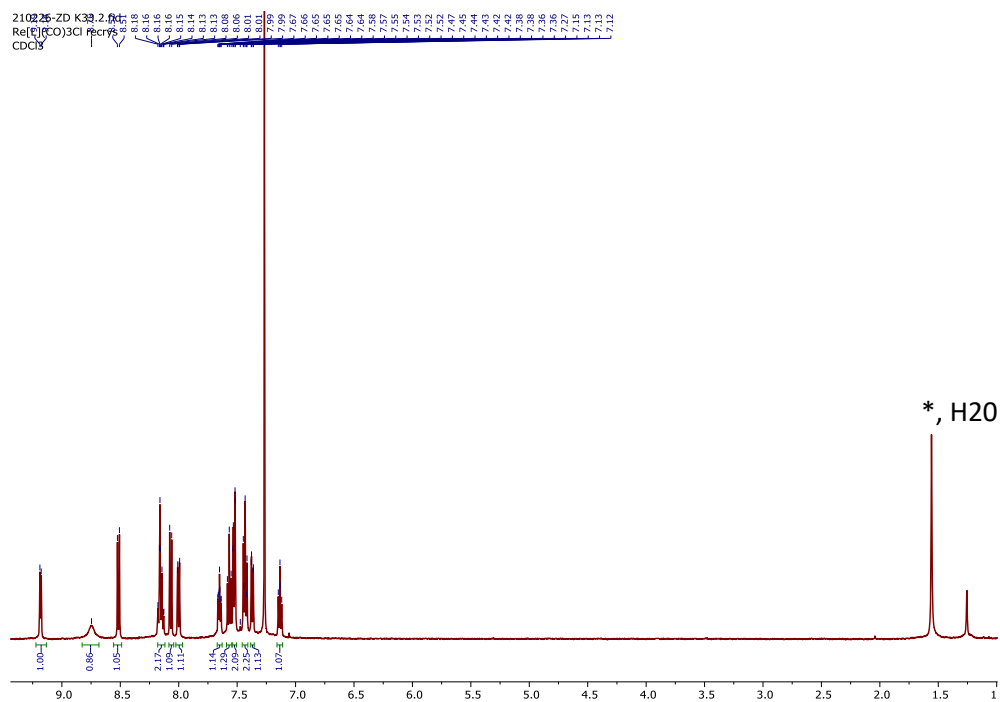

Figure S3:  $^1\text{H}$  NMR spectrum of **1**,  $\text{CDCl}_3$ . Asterisks denote known impurities

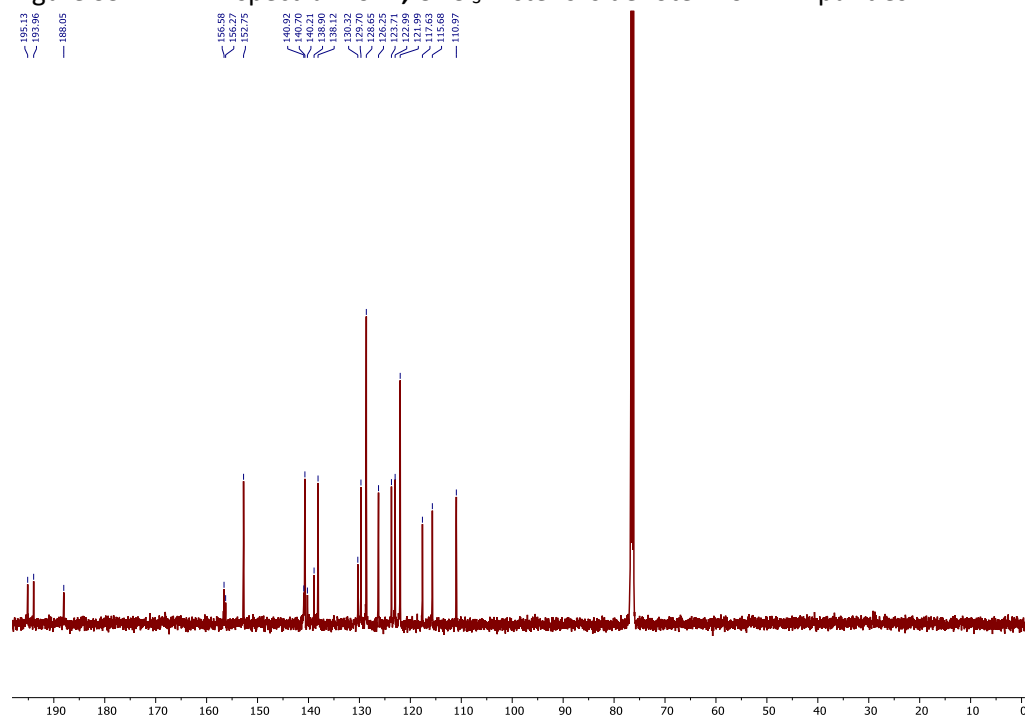

Fig S4:  $^{13}\text{C}$  UDEFT NMR spectrum of **1**,  $\text{CDCl}_3$

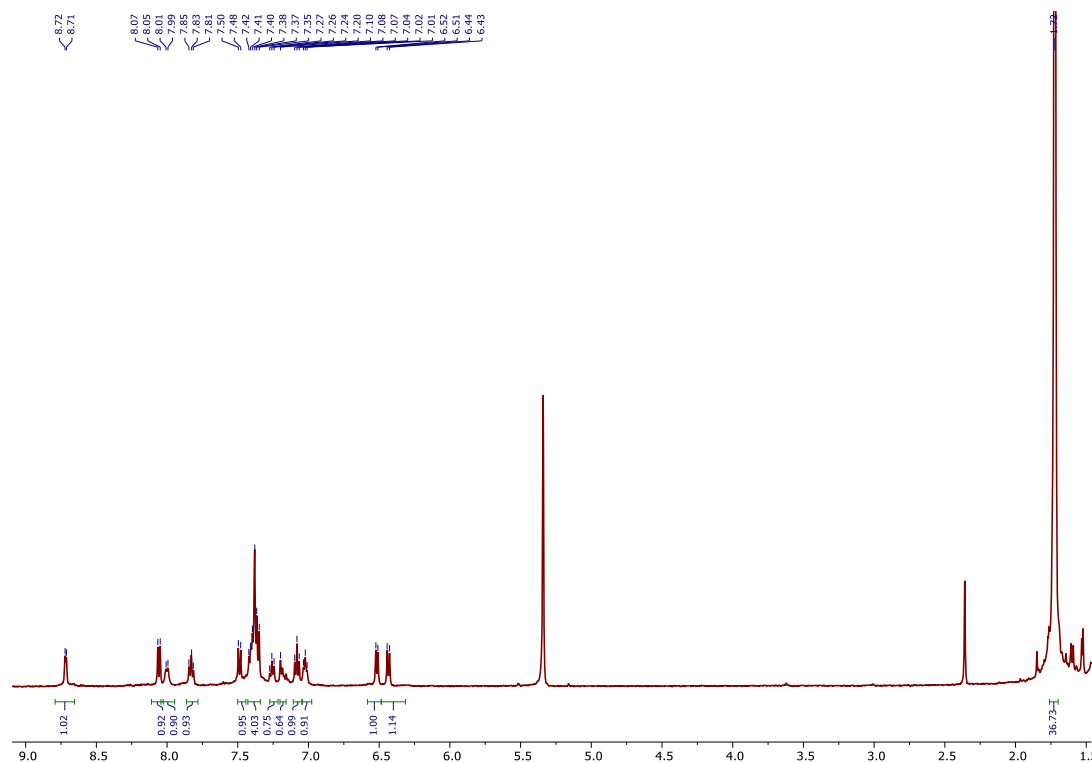

Figure S5:  $^1\text{H}$  NMR spectrum of **2**,  $\text{CD}_2\text{Cl}_2$

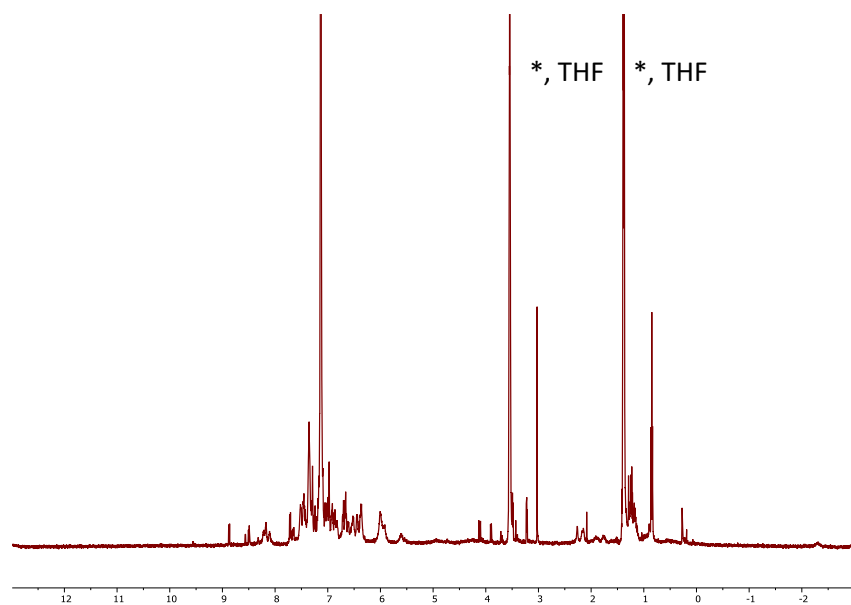

Fig S6:  $^1\text{H}$  NMR in  $\text{C}_6\text{D}_6$  of the reaction of **1** with 2.2 eq. of  $\text{KC}_8$  after workup. Asterisks denote known impurities

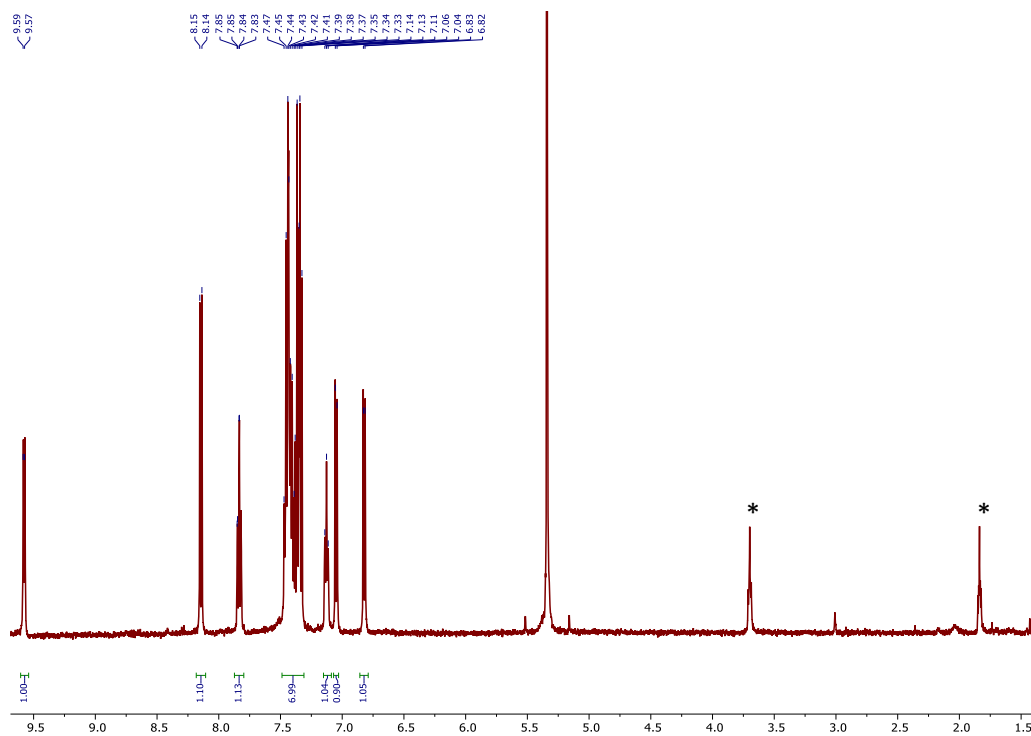

Fig S7:  $^1\text{H}$  NMR of **4** in  $\text{CD}_2\text{Cl}_2$ . Asterisks denote known impurities (THF)

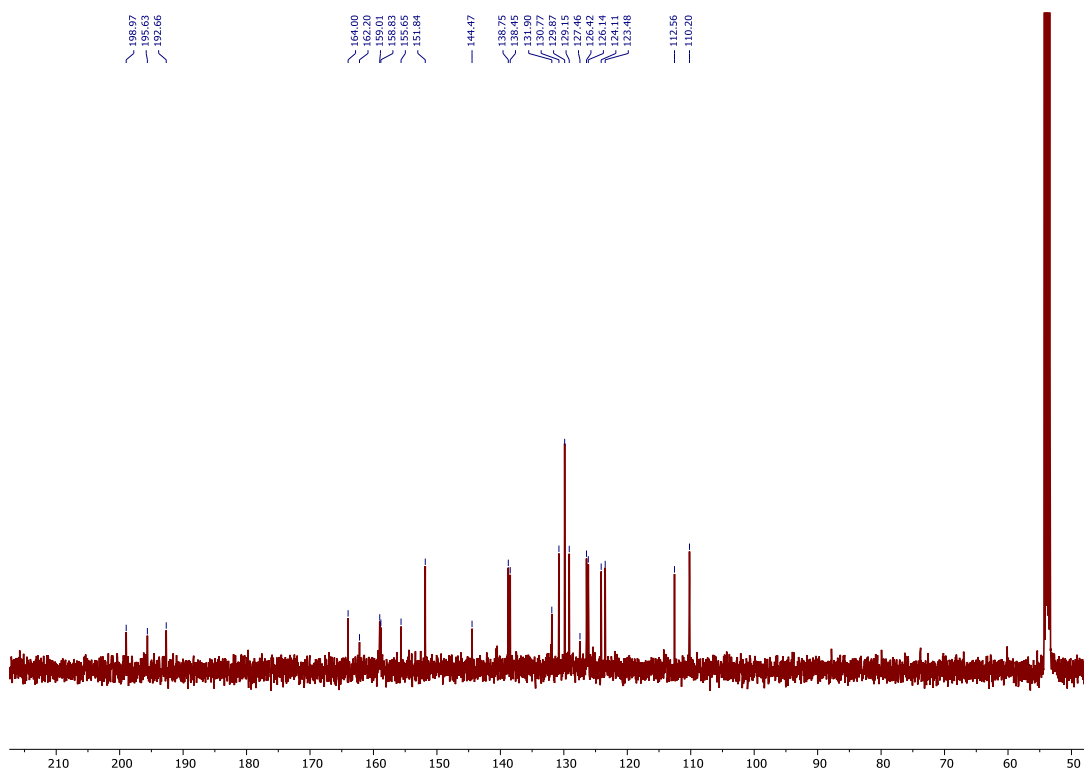

Fig S8:  $^{13}\text{C}$  UDEFT NMR of **4** in  $\text{CD}_2\text{Cl}_2$

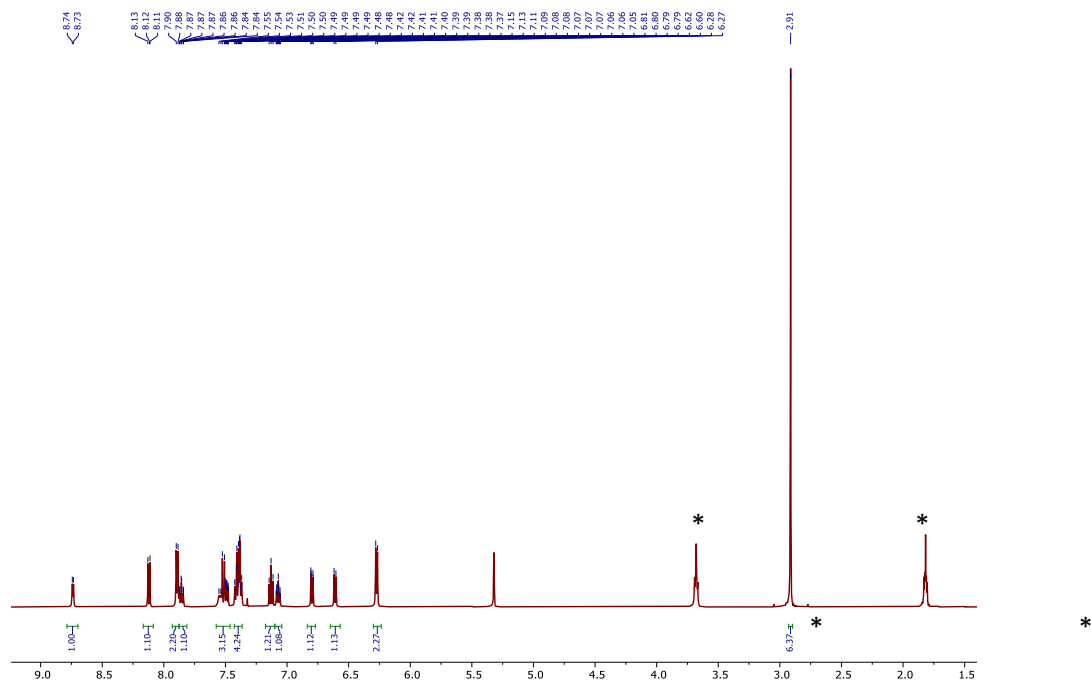

Fig S9:  $^1\text{H}$  NMR of ReDMAP, **5** in  $\text{CD}_2\text{Cl}_2$ . Asterisks denote known solvent impurities (THF)

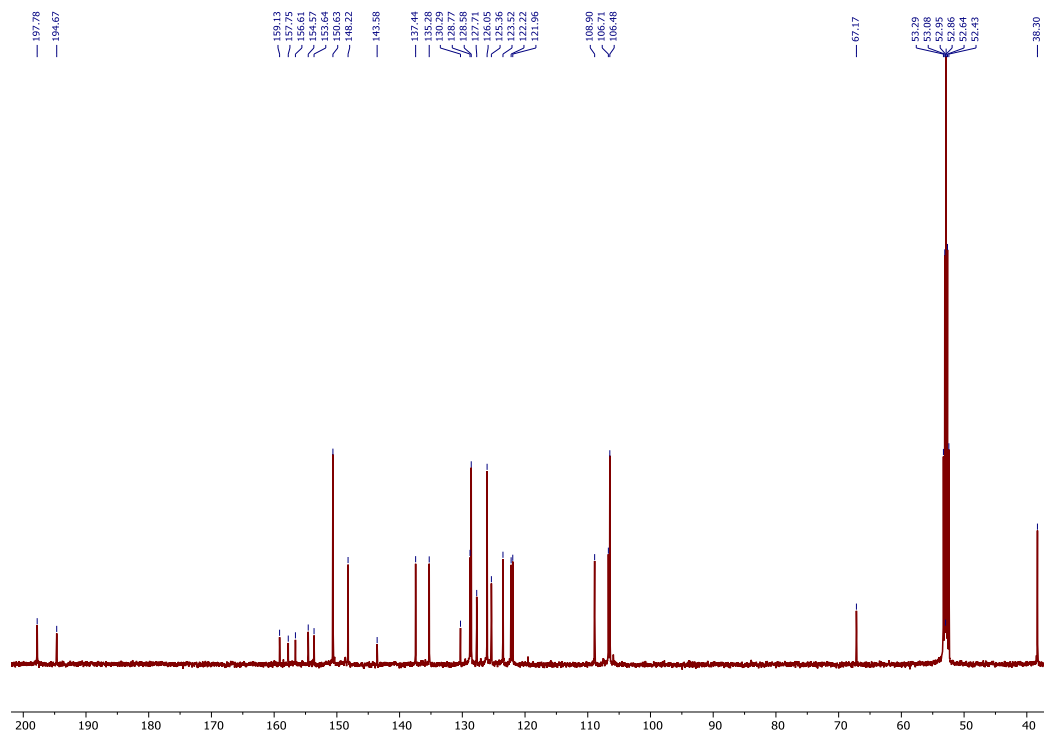

Fig S10:  $^{13}\text{C}$  UDEFT NMR of ReDMAP, **5** in  $\text{CD}_2\text{Cl}_2$

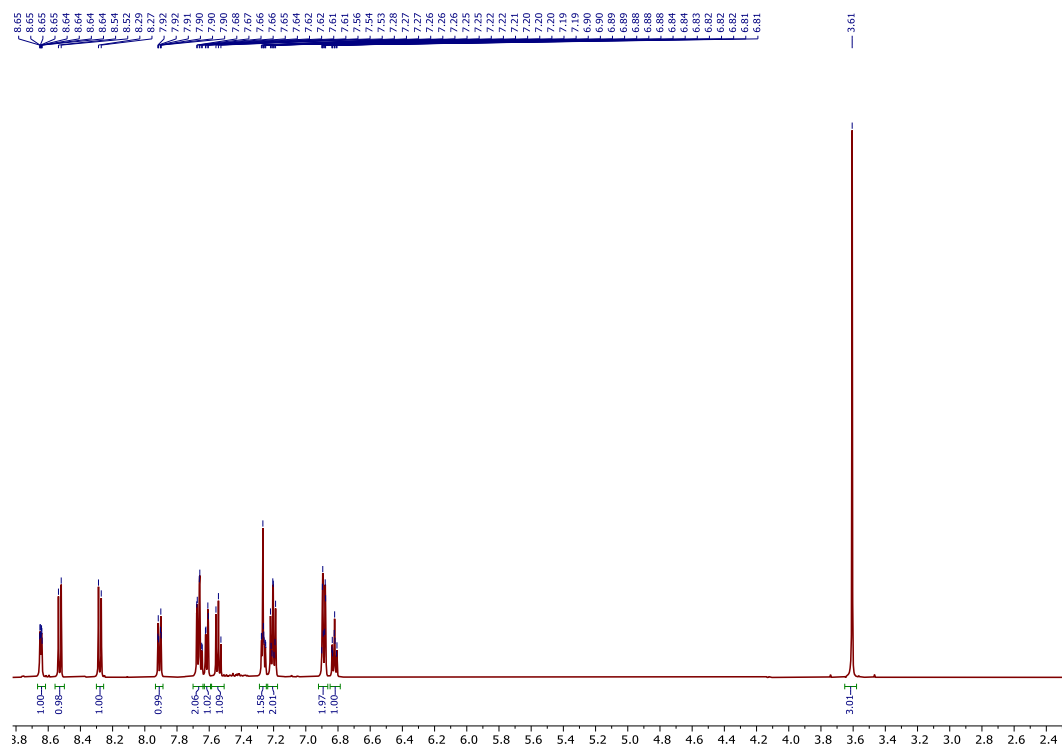

Fig S11:  $^1\text{H}$  NMR of **iii** in  $\text{CDCl}_3$

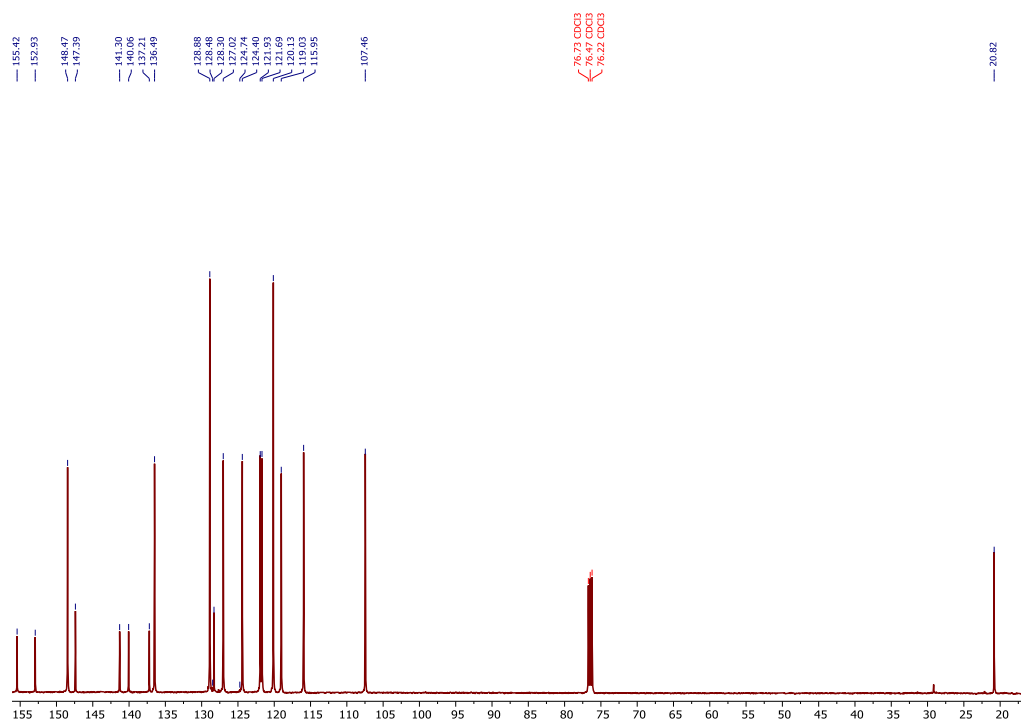

Fig S12:  $^{13}\text{C}$  UDEFT NMR of **iii** in  $\text{CDCl}_3$

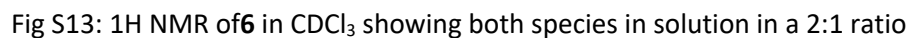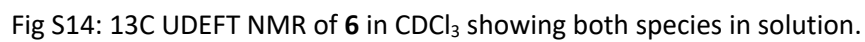

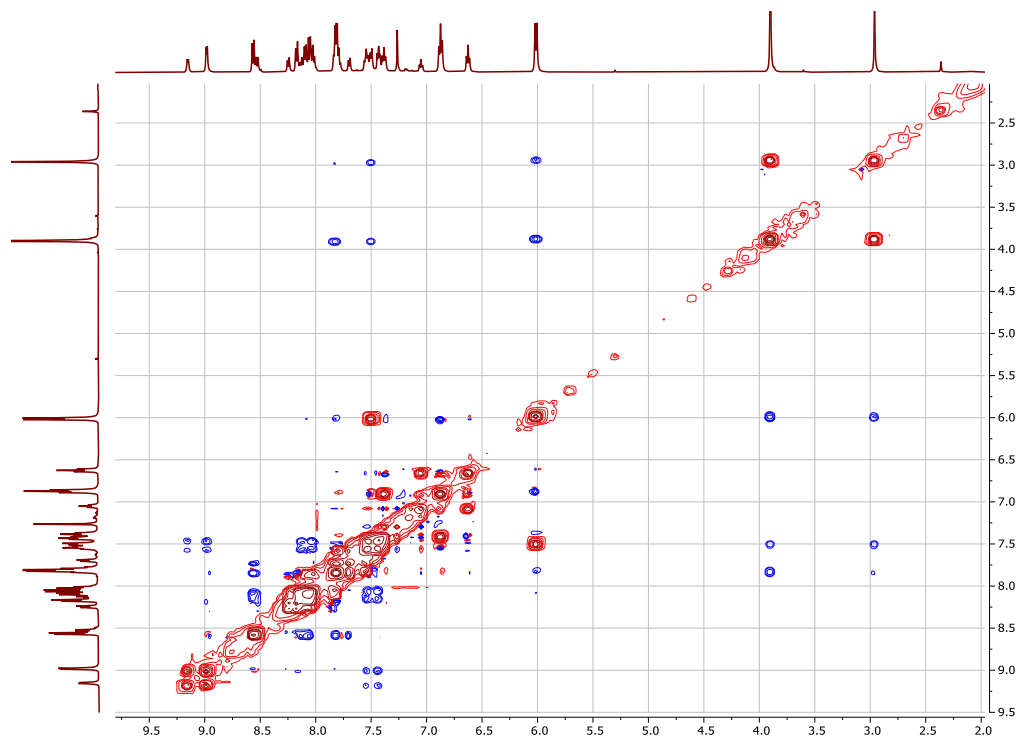

Fig S15: NOESY/EXSY NMR of **6** in degassed  $\text{CDCl}_3$ . Blue cross peaks are NOE signals, red are exchange signals.  $D8 = 0.75\text{s}$ . COSY-like symmetrisation applied to increase S/N

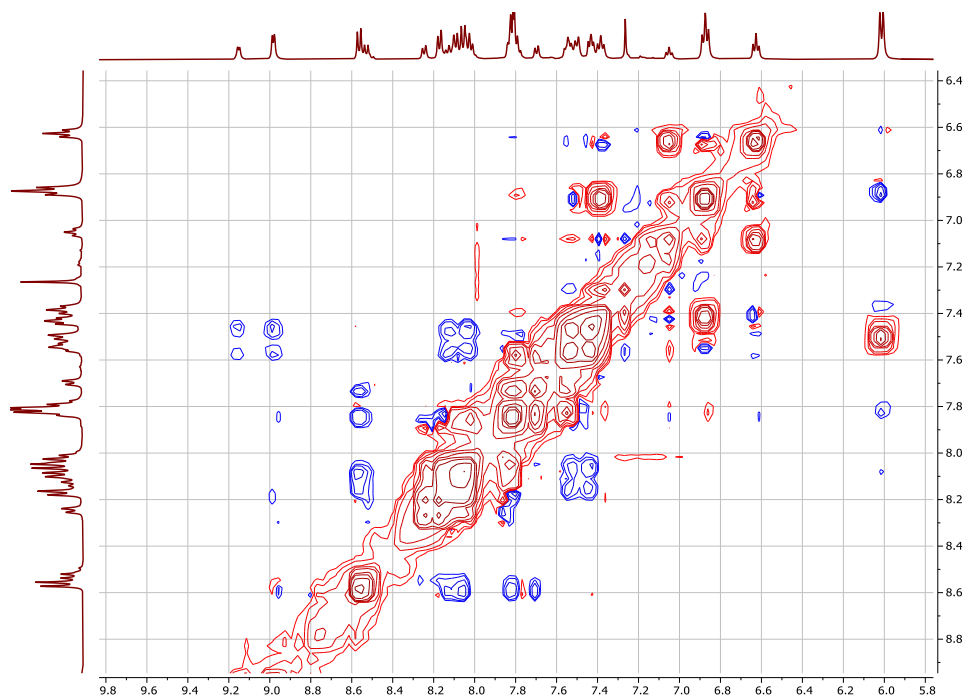

Fig S16: Expansion of aromatic region NOESY/EXSY NMR of **6** in degassed  $\text{CDCl}_3$ . Blue cross peaks are NOE signals, red are exchange signals.  $D8 = 0.75\text{s}$ . COSY-like symmetrisation applied to increase S/N.

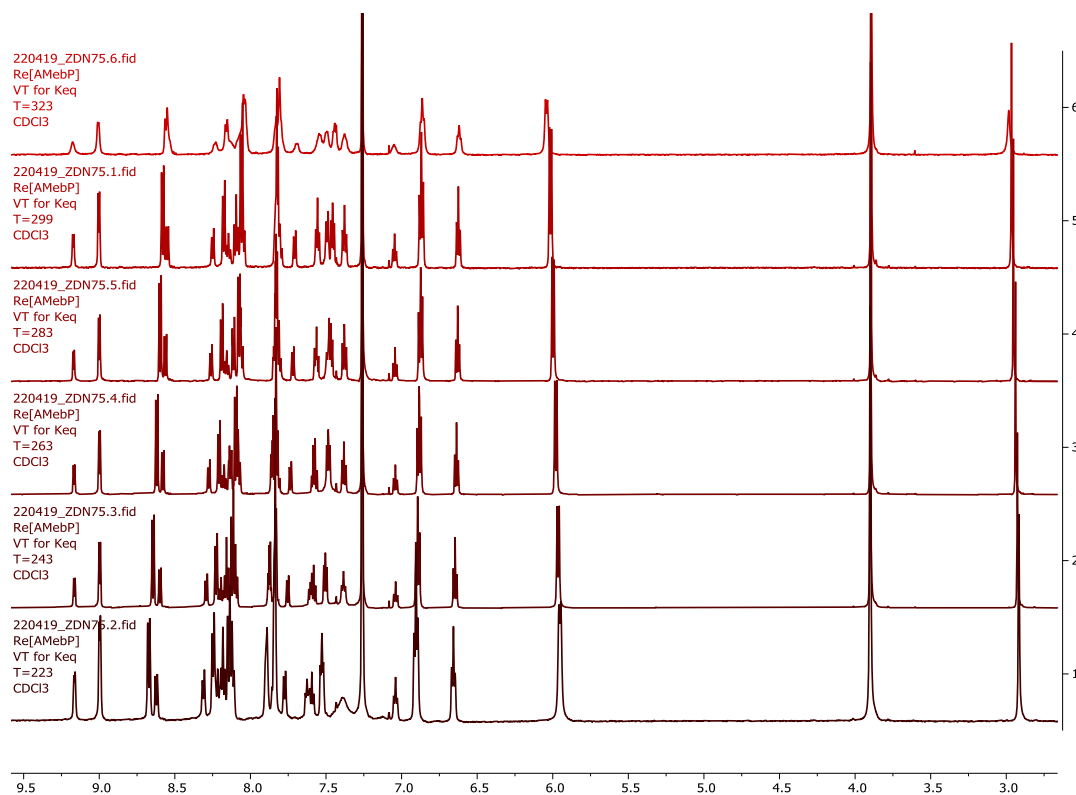

Fig S17: Attempts at V'ant Hoff analysis of **6** in  $\text{CDCl}_3$ . Note the very low change in integrals with changing temperature.

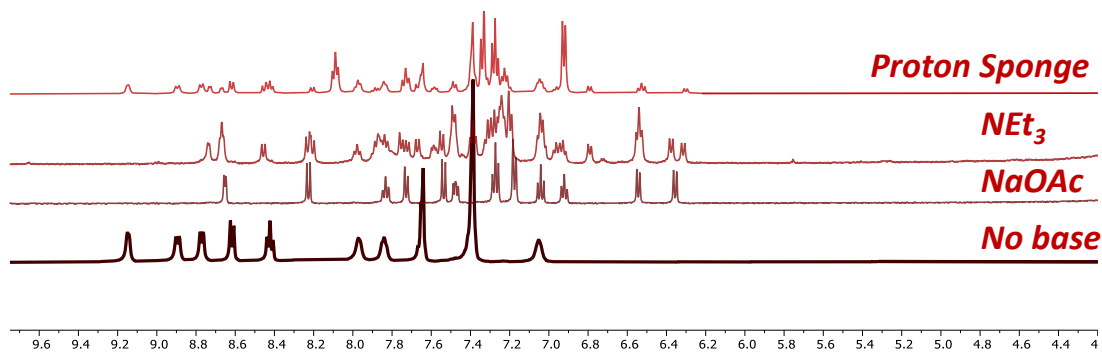

Fig S18: NMR experiments with bases of various basicity to determine pKa of complex **1** in  $d_6$  DMSO, 500 Mhz. Simply comparing the spectra between without a base vs with base added shows at what pKa **1** is deprotonated.

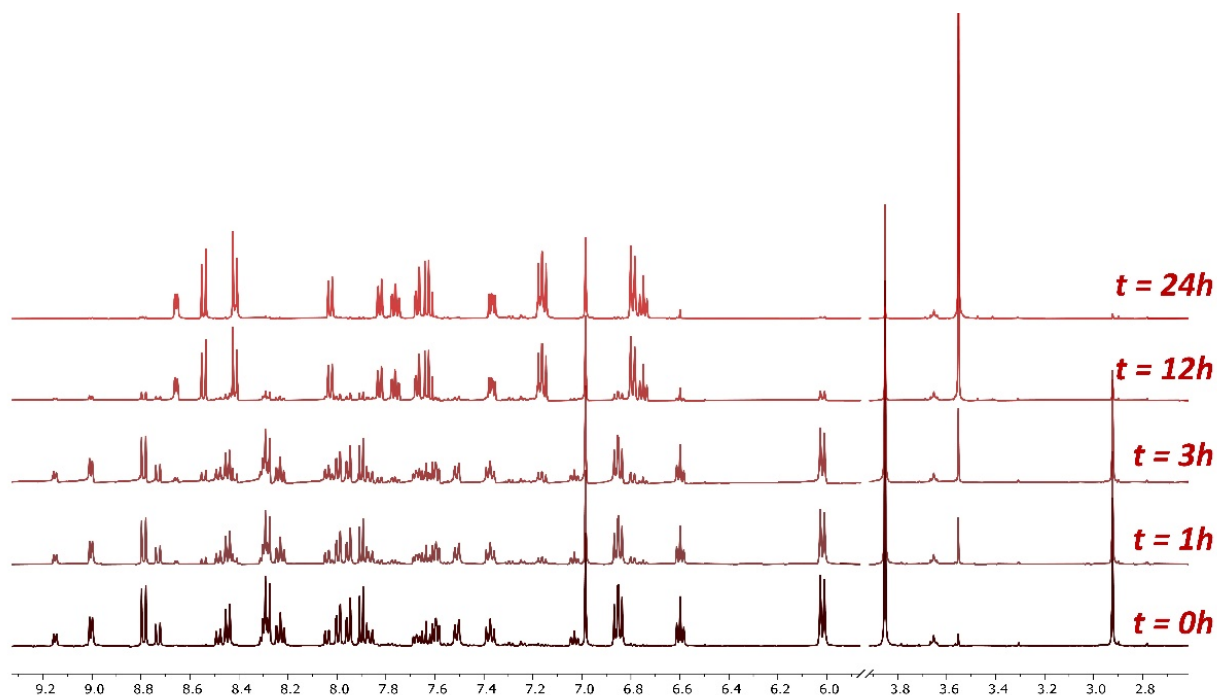

Fig S19: The decomposition of **6** at room temperature in anhydrous and degassed CD<sub>3</sub>CN in the dark, over time. Moderate heating was found to greatly accelerate this decomposition with total demetallation of the complex observed after 30 minutes at 50 °C. Other polar solvents do not seem to have the same effect; no decomposition was observed when **6** was exposed to DMF, THF or MeOH.

## Spectroelectrochemistry Data

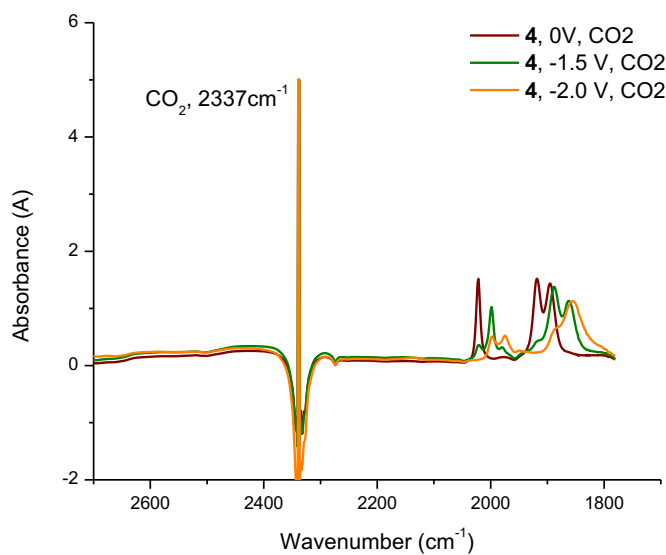

Figure S20: Spectroelectrochemical spectra for **1** with CO<sub>2</sub> sparged DMF. 0.3M TBAPF<sub>6</sub>, Pt mesh, CE: Pt wire, RE: Ag wire

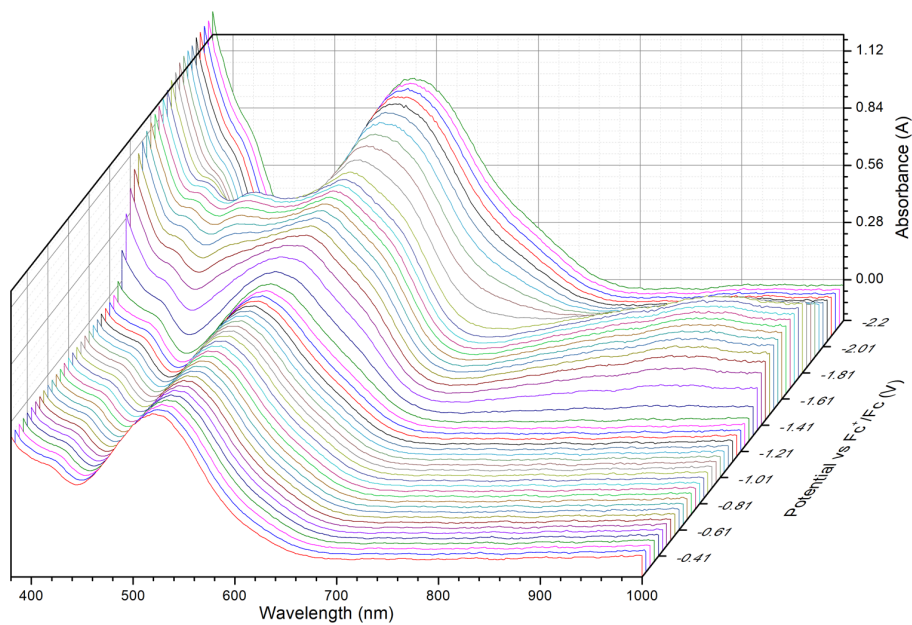

Fig S21: UV-Vis SEC of complex **1** in DMF, 0.3 M TBAPF<sub>6</sub>. WE: Pt mesh, CE: Pt wire, RE: Ag wire

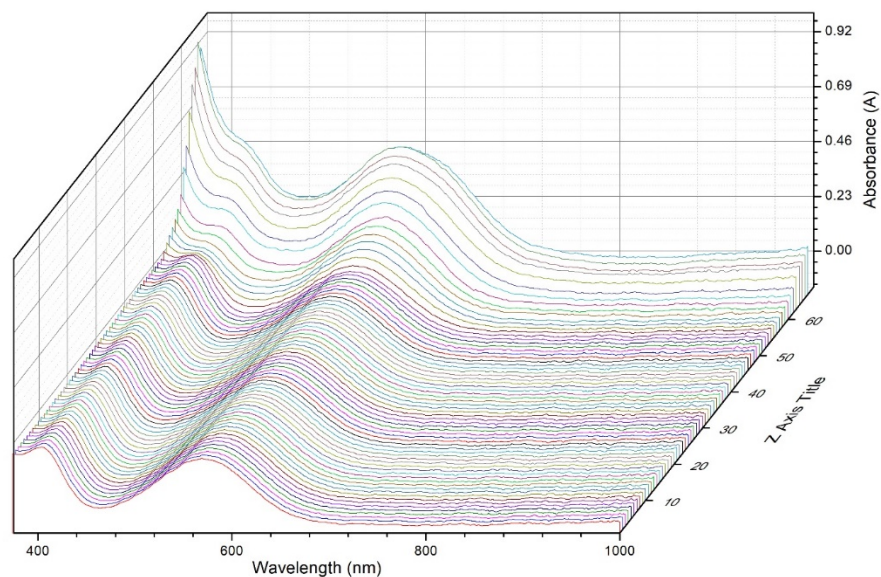

Fig S22: UV-Vis SEC of complex **4** in DMF, 0.3 M TBAPF<sub>6</sub>. WE: Pt mesh, CE: Pt wire, RE: Ag wire

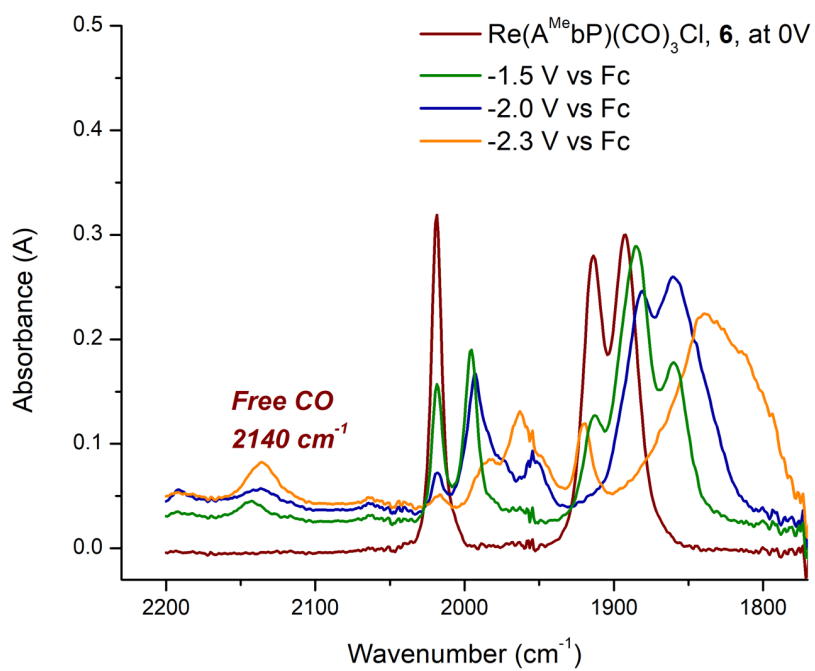

Fig S23: IR-SEC of **6** with 0.3 M TBAPF<sub>6</sub> in DMF under Ar. Pt mesh WE, Pt wire CE, Ag wire RE

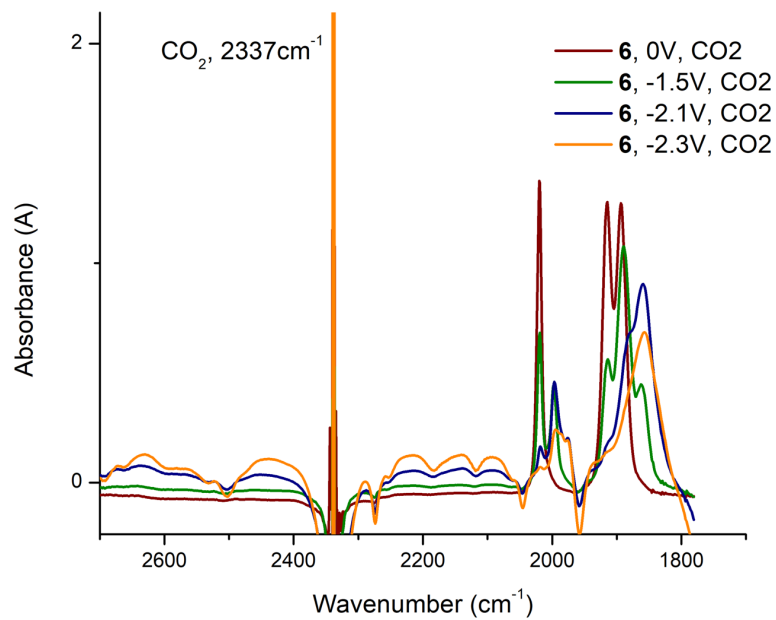

Fig S24: IR-SEC of **6** in 0.3 M TBAPF<sub>6</sub> DMF with CO<sub>2</sub> sparged DMF. Pt mesh WE, Pt wire CE, Ag wire RE

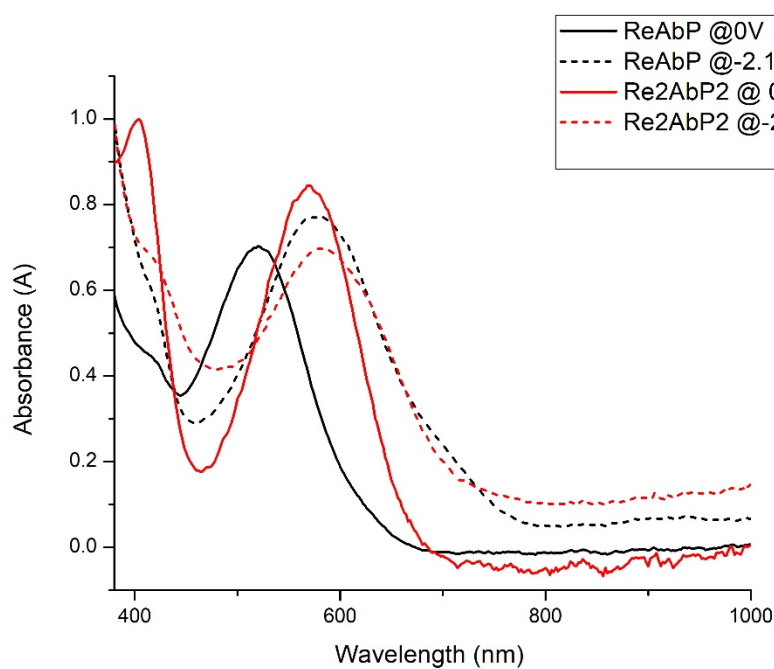

Fig S25: Comparing the start and end points of UV-Vis SEC experiments between **1** and **5** in DMF, 0.3M TBAPF<sub>6</sub>.

## IR Spectra

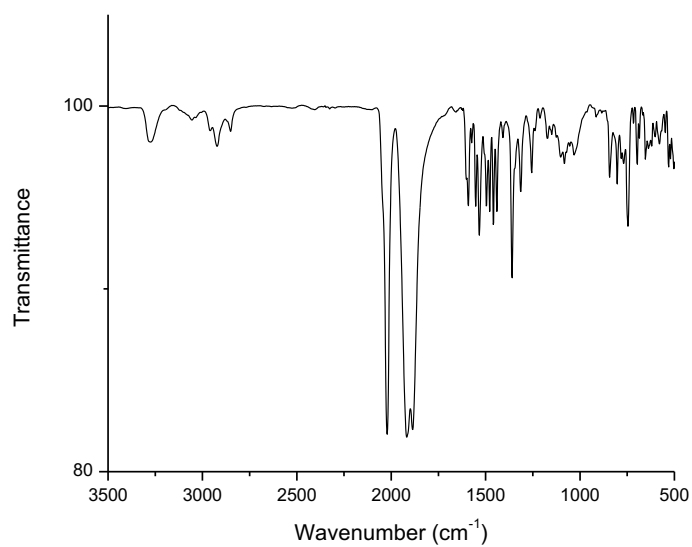

**Fig S26:** IR spectrum of **1** collected as a KBr pellet

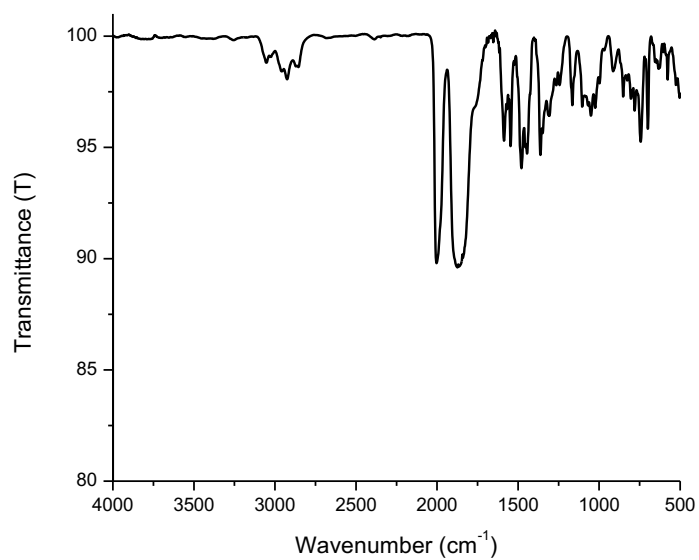

**Fig S27:** IR spectrum of **2** collected as a KBr pellet

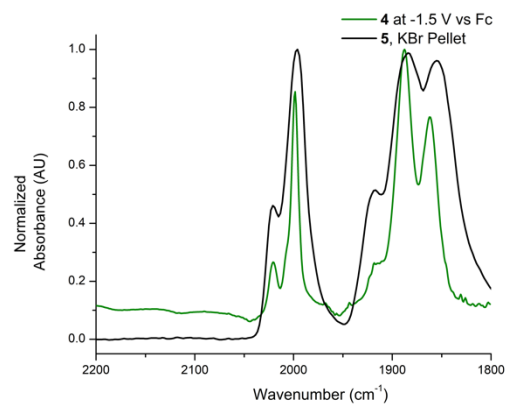

**Fig S28:** Overlay of KBr pellet IR spectrum of **2** with SEC data of **1** in DMF at -1.5 V vs Fc

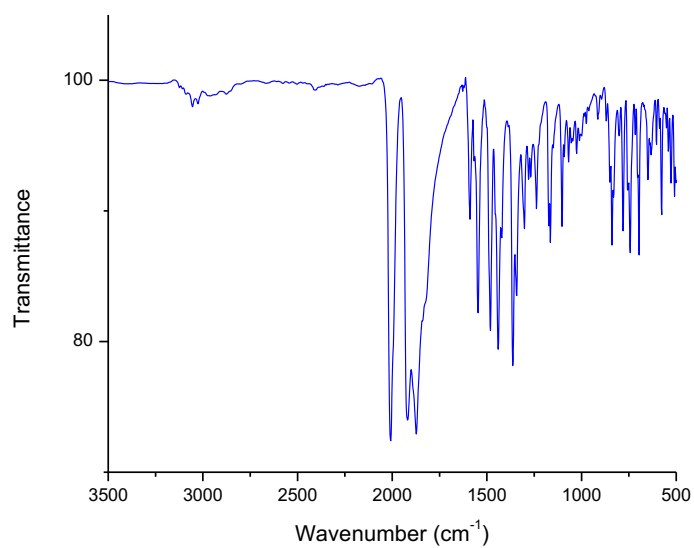

**Fig S29:** IR spectrum of **4** collected as a KBr pellet

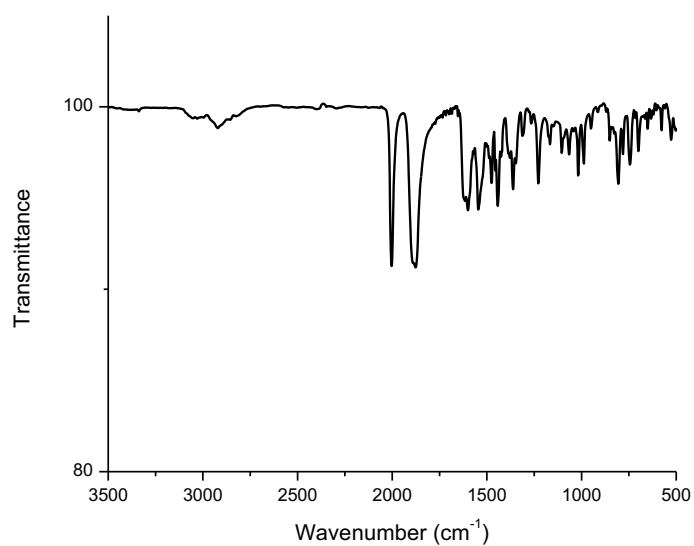

**Fig S30:** IR spectrum of **5** collected as a KBr pellet

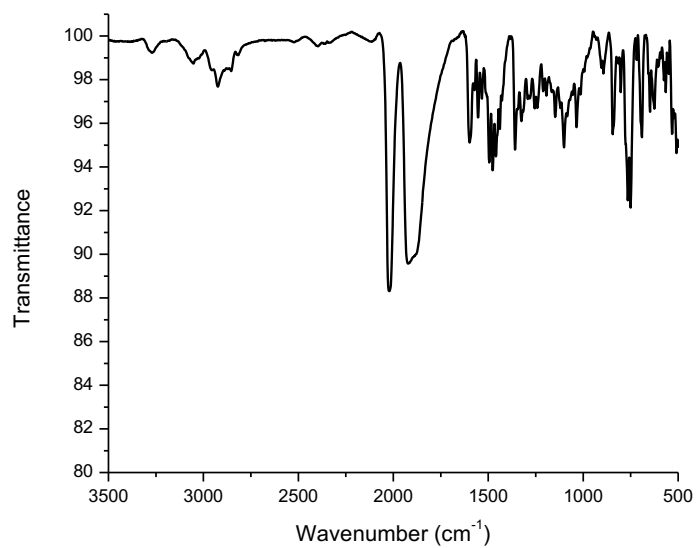

**Fig S31:** IR spectrum of **6** collected as a KBr pellet

## Electrochemistry

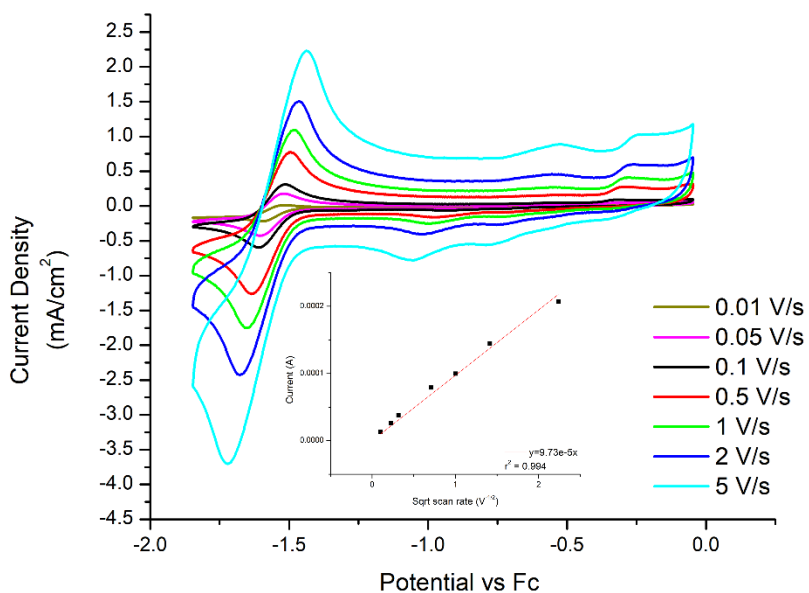

**Fig S32:** Different scan rates for the first reductive wave of complex **1**. CVs taken in DMF with GC disk WE, Pt mesh CE and Ag/AgCl reference electrode. Inset is square root of scan rate vs current

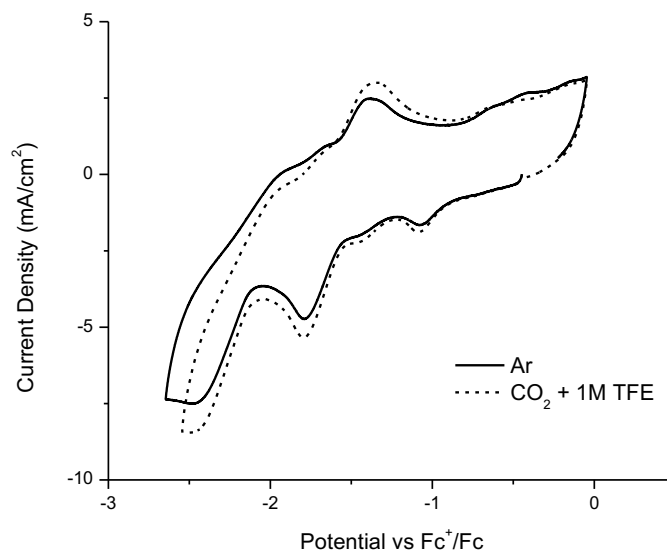

**Fig S33:** CV of **1** at 13 V/s under Ar and CO<sub>2</sub> with 1M TFE. GC WE, Pt mesh CE, and Ag/AgCl pseudoreference.

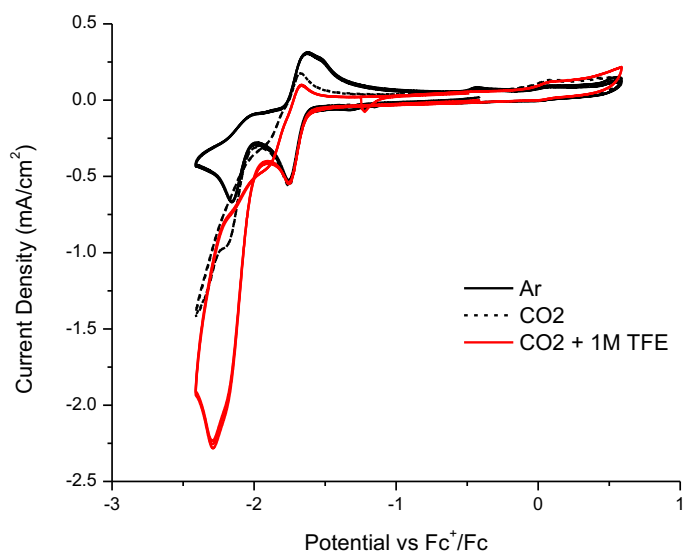

**Fig S34:**  $\text{Re}(\text{bpy})(\text{CO})_3\text{Cl}$  CV at 0.1 V/s with GC WE, Pt mesh CE, and Ag/AgCl pseudoreference electrodes. Under an atmosphere of  $\text{CO}_2$

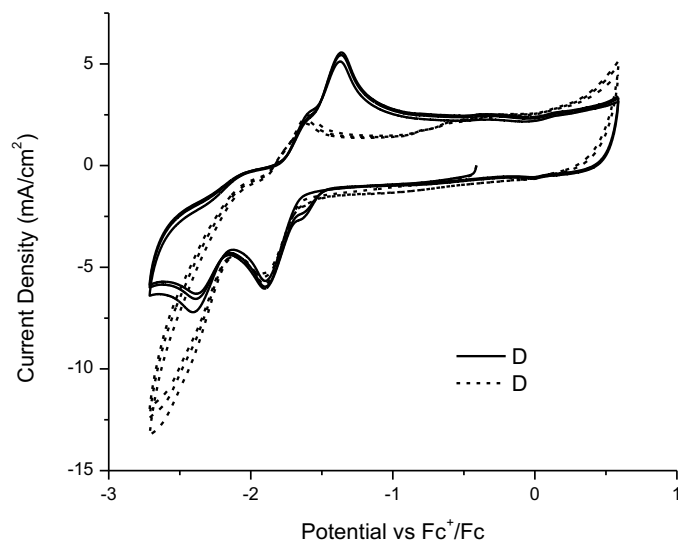

**Fig S35:** CV of  $\text{Re}(\text{bpy})(\text{CO})_3\text{Cl}$  at 15V/s in DMF. GC WE, Pt mesh CE and Ag/AgCl pseudoreference.

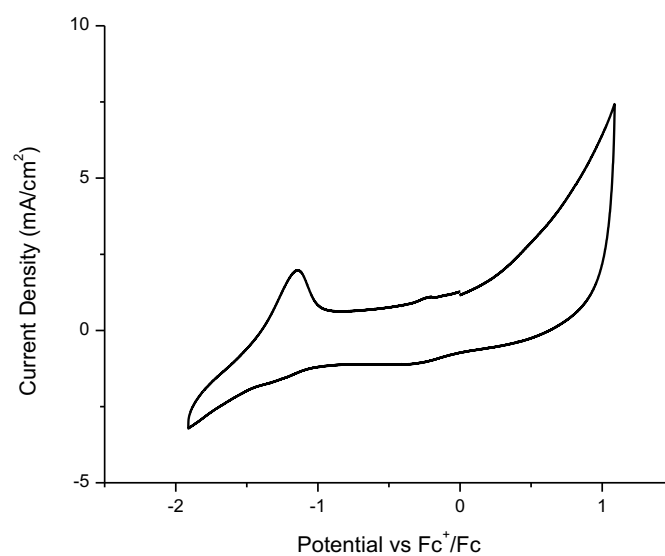

**Fig S36:** Representative rinse test from CPE experiments. The GC electrode used in the CPE was gently rinsed with clean solvent and immersed in 0.1M DMF. A CV was taken at 0.1 V/s with Pt mesh CE and Ag/AgCl pseudoreference

Table S2: Electrolysis results under different conditions.

| Conditions | No Catalyst,<br>DMF, 1M TFE, -<br>2.0 V |                  | 1, DMF, 1 M TFE,<br>-2.0 V <sup>a</sup> |                  | 1, DMF, 1M<br>PhOH, -2.0 V <sup>b</sup> |                  | 1, DMF 1M<br>H <sub>2</sub> O, -2.0 V <sup>b</sup> |                  | 1, MeCN, 1M<br>TFE, -2.0 V <sup>b</sup> |                  | 5, DMF, 1M TFE-<br>2.2 V <sup>b</sup> , |                  | 6, DMF, 1M TFE, -2.0 V<br><sup>c</sup> |                   | Post CPE electrode,<br>DMF, 1M TFE, -2.0<br>V <sup>b,d</sup> |                  |
|------------|-----------------------------------------|------------------|-----------------------------------------|------------------|-----------------------------------------|------------------|----------------------------------------------------|------------------|-----------------------------------------|------------------|-----------------------------------------|------------------|----------------------------------------|-------------------|--------------------------------------------------------------|------------------|
| Time       | TON <sub>CO</sub>                       | FE <sub>CO</sub> | TON <sub>CO</sub>                       | FE <sub>CO</sub> | TON <sub>CO</sub>                       | FE <sub>CO</sub> | TON <sub>CO</sub>                                  | FE <sub>CO</sub> | TON <sub>CO</sub>                       | FE <sub>CO</sub> | TON <sub>CO</sub>                       | FE <sub>CO</sub> | TON <sub>CO</sub>                      | FE <sub>CO</sub>  | TON <sub>CO</sub>                                            | FE <sub>CO</sub> |
| 0.5        | 0                                       | 0                | 0.51 (±<br>0.16)                        | 30.5 (±<br>8)    | n/a                                     | n/a              | n/a                                                | n/a              | n/a                                     | n/a              | 0                                       | 0                | 0.087 (±<br>0.04)                      | 17.49 (±<br>7.4)  | 0                                                            | 0                |
| 1          | 0                                       | 0                | 1.2 (±<br>0.27)                         | 49.8 (±<br>5)    | 0.17                                    | 19.0             | 1.4                                                | 41.2             | 0.6                                     | 22.1             | 0                                       | 0                | 0.21(±<br>0.00)                        | 25.93(±<br>9.24)  | 0                                                            | 0                |
| 1.5        | 0                                       | 0                | 2.1 (±<br>0.8)                          | 80.9 (±<br>8)    | n/a                                     | n/a              | n/a                                                | n/a              | n/a                                     | n/a              | 0                                       | 0                | 0.32(±<br>0.023)                       | 30.48 (±<br>7.38) | 0                                                            | 0                |
| 2          | 0                                       | 0                | 2.4 (±<br>0.27)                         | 88.0 (±<br>12)   | 0.26                                    | 25.7             | 1.9                                                | 36.6             | 1.1                                     | 34.3             | 0                                       | 0                | 0.419(±<br>0.07)                       | 32.6 (±<br>3.95)  | 0                                                            | 0                |
| 3          | 0                                       | 0                | 3.6 (±<br>0.74)                         | 88.0<br>(±11)    | 0.48                                    | 20.3             | 2.1                                                | 29.5             | 1.5                                     | 37.7             | 0                                       | 0                | 0.614(±<br>0.101)                      | 37.46 (±<br>3.32) | 0                                                            | 0                |
| 4          | 0                                       | 0                | 4.1 (±<br>0.6)                          | 87.5 (±<br>11)   | 0.53                                    | 18.3             | 2.6                                                | 30.1             | 1.8                                     | 45.9             | 0                                       | 0                | 0.776(±<br>0.13)                       | 40.96 (±<br>3.91) | 0                                                            | 0                |
| 5          | 0                                       | 0                | 4.9 (±<br>0.81)                         | 83.2 (±<br>7)    | 0.78                                    | 16               | 3.1                                                | 18.9             | 2.0                                     | 51.3             | 0.1                                     | 0                | 0.902(±<br>0.12)                       | 41.78 (±<br>3.52) | 0                                                            | 0                |
| 6          | 0                                       | 0                | 5.7 (±<br>0.54)                         | 79.6 (±<br>9)    | 0.85                                    | 14               | 3.1                                                | 16.0             | 2.2                                     | 42.1             | 0.1                                     | 0                | 1.20(±<br>0.03)                        | 49.18 (±<br>7.01) | 0                                                            | 0                |

All potentials referenced to Fc. All experiments performed with 0.1 M TBAPF<sub>6</sub> <sup>a</sup> – data based on triplicate data. Standard deviation given in parentheses <sup>b</sup> – data from single runs using conditions listed. <sup>c</sup> – data based on duplicate data. Standard deviation given in parentheses. <sup>d</sup> – This controls experiment was performed to test if the decomposition onto the electrode during CPE with **1** is capable of CO<sub>2</sub>RR or HER. Recent research has shown Pt counter electrodes are capable of releasing Pt<sup>2+</sup> ions into solution which can then deposit onto working electrodes and performed under catalytic conditions.<sup>15–17</sup> The electrode was first used in a 6h CPE with **1** then, without cleaning, transferred to fresh 1M TFE in DMF electrolyte without **1** present. The electrode was then tested for a second 6h CPE which showed no CO and very little H<sub>2</sub> produced. The H<sub>2</sub> produced would correspond to ~ 0.03 TON if using the concentration of **1** from the initial CPE, showing little contribution of the decomposition products toward the observed CO<sub>2</sub>RR and HER.

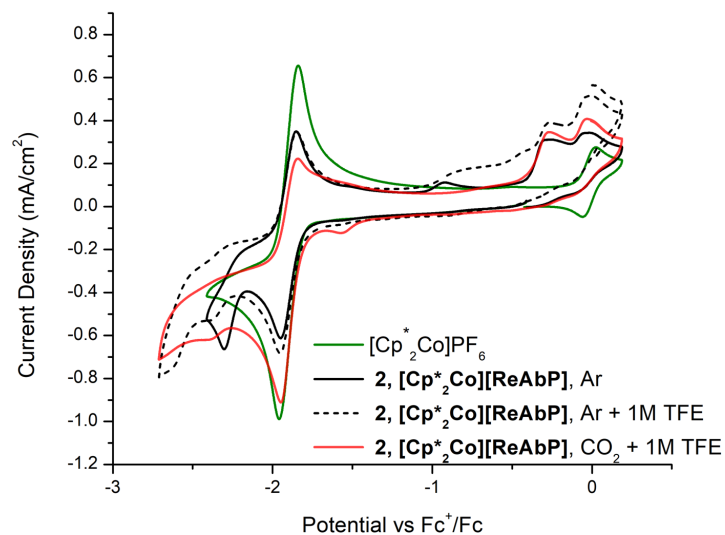

**Fig S37:** the cyclic voltammogram of complex **2** in DMF collected with WE: GC disk, CE: Pt mesh, RE: Ag/AgCl pseudoreference. Green trace is  $[\text{Cp}^*_2\text{Co}]\text{PF}_6$  as purchased from Sigma-Aldrich

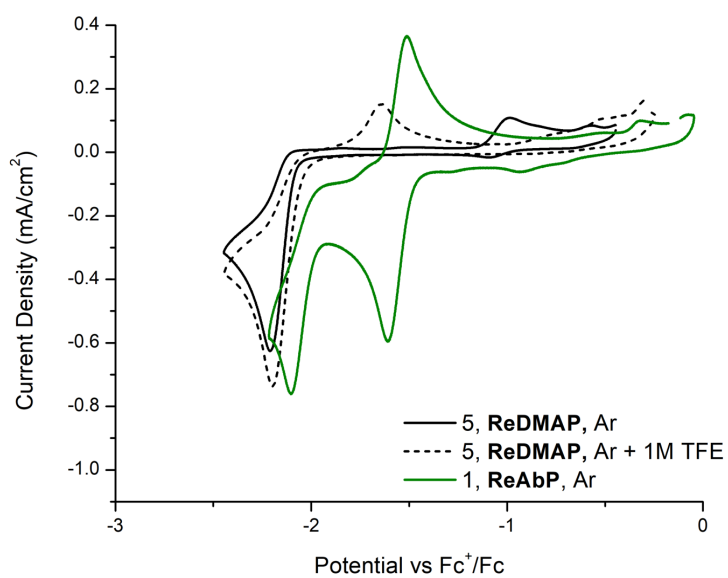

**Fig S38:** The CV of **5** in DMF, 0.1M  $\text{TBAPF}_6$ , Ar with overlay **1** under identical conditions. WE: GC disk, CE: Pt mesh, RE: Ag/AgCl pseudoreference

## UV-Vis Spectra

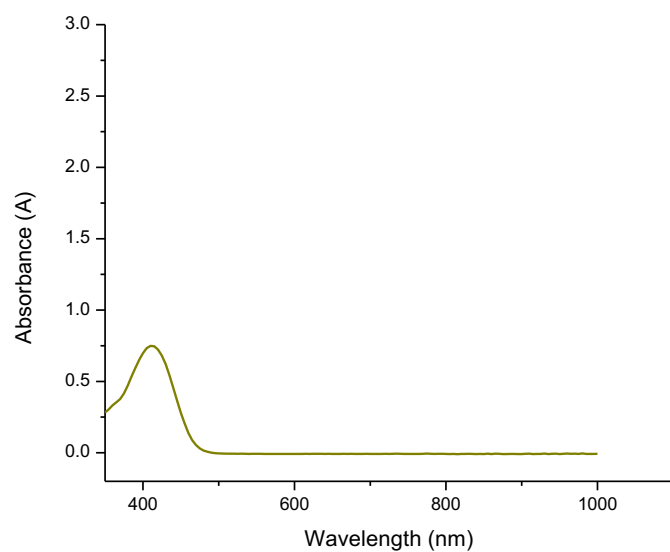

**Fig S39:** The UV-Vis spectrum of **ii** in THF

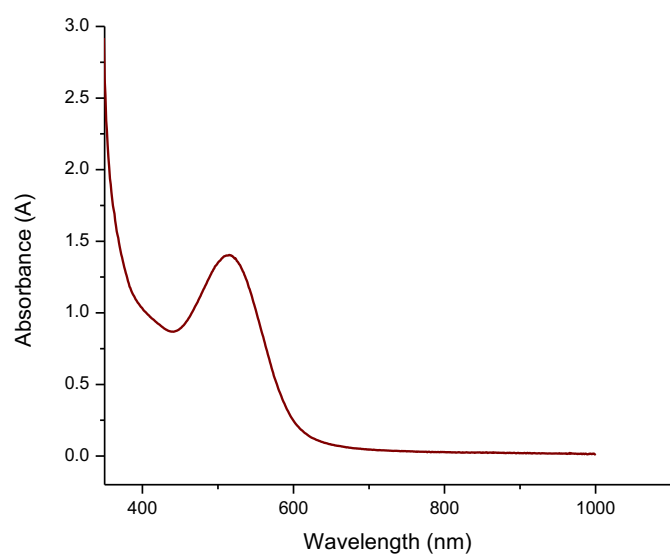

**Fig S40:** The UV-Vis spectrum of **1** in DMF

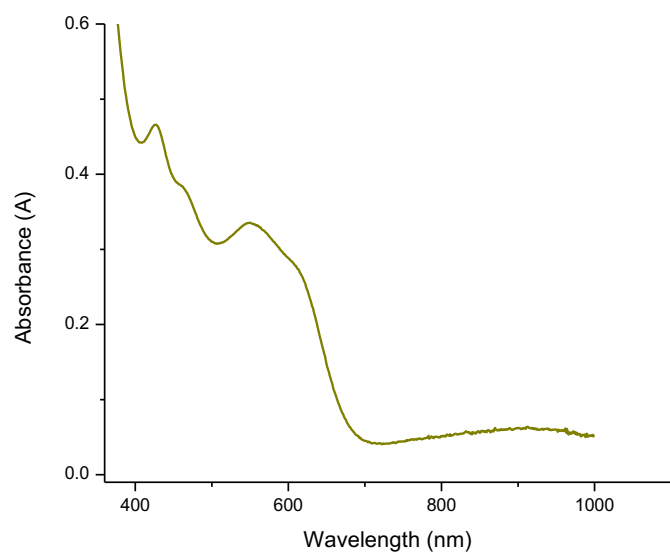

**Fig S41:** The UV-Vis spectrum of **2** in THF

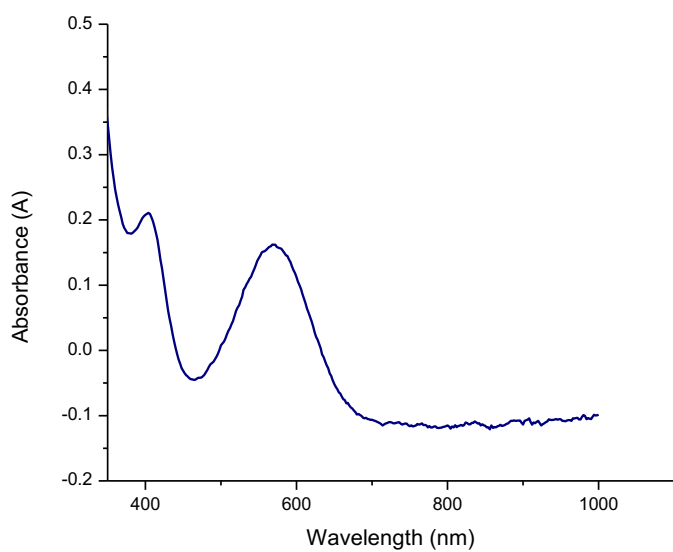

**Fig S42:** The UV-Vis spectrum of **4** in DMF

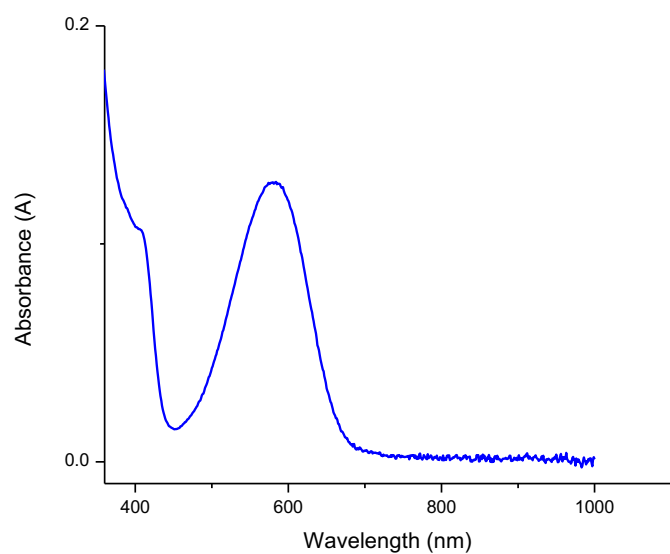

**Fig S43:** The UV-Vis spectrum of **5** in THF

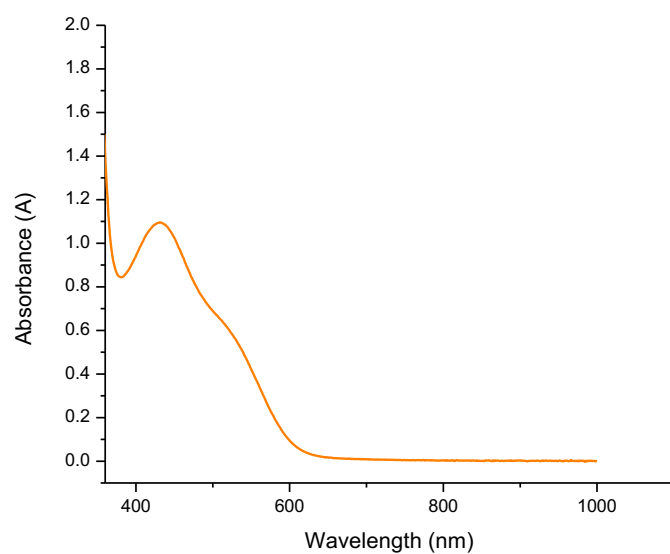

**Fig S44:** The UV-Vis spectrum of **6** in THF

## Supplementary Crystal Structures and X-ray Crystallography Tables

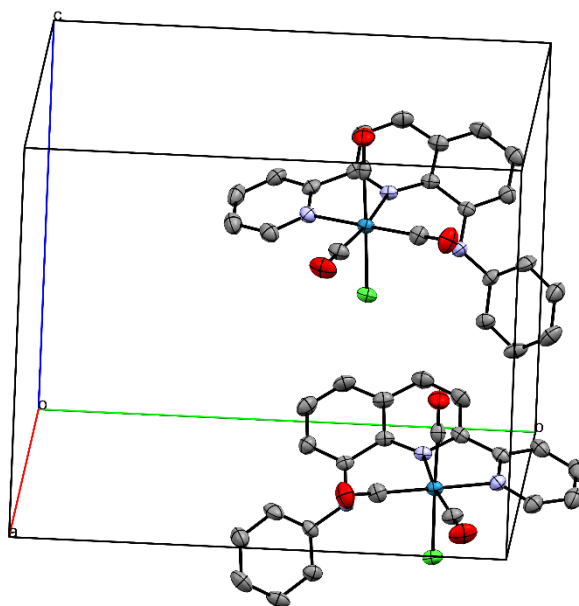

**Figure S45:** Both helically chiral isomers are seen in the unit cell of **1**.

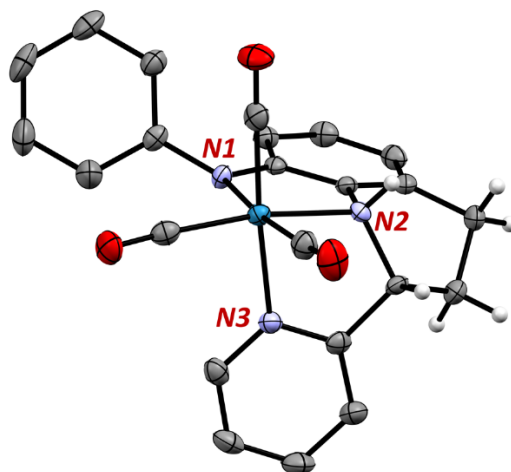

**Figure S46.** Single crystal X-ray structure of the dearomatized Re(I) complex **3** is shown with ellipsoids at 50% with solvent and most hydrogen atoms removed for clarity. Hydrogens shown are to highlight the dearomatization of the quinoline backbone. Selected bond lengths (Å): Re1-N1 = 2.154(2), Re1-N2 = 2.198(3), Re1-N3 = 2.195 (3).

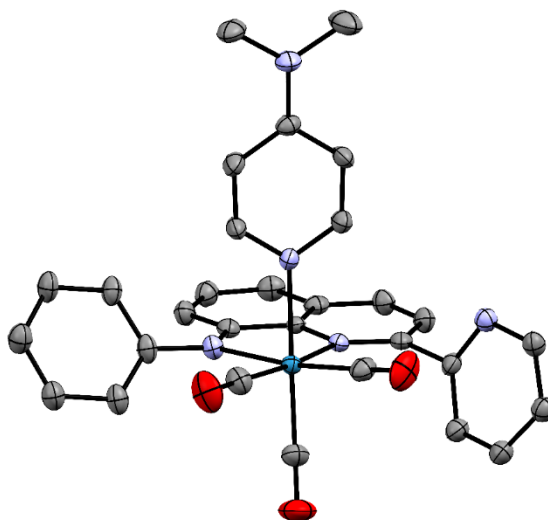

**Fig S47:** The X-ray crystal structure of **5**, hydrogens and solvent removed for clarity.

| Table 2 Crystal data and structure refinement for compounds <b>1,2,4</b> |                                                                    |                                                                                     |                                                                    |
|--------------------------------------------------------------------------|--------------------------------------------------------------------|-------------------------------------------------------------------------------------|--------------------------------------------------------------------|
| Identification code                                                      | <b>1</b>                                                           | <b>2</b>                                                                            | <b>4</b>                                                           |
| Empirical formula                                                        | C <sub>23</sub> H <sub>15</sub> ClN <sub>3</sub> O <sub>3</sub> Re | C <sub>55</sub> H <sub>54</sub> ClCoF <sub>2</sub> N <sub>3</sub> O <sub>3</sub> Re | C <sub>25.5</sub> H <sub>20</sub> N <sub>3</sub> O <sub>3</sub> Re |
| Formula weight                                                           | 603.03                                                             | 1123.59                                                                             | 602.64                                                             |
| Temperature/K                                                            | 296.15                                                             | 173.0                                                                               | 173.0                                                              |
| Crystal system                                                           | monoclinic                                                         | orthorhombic                                                                        | monoclinic                                                         |
| Space group                                                              | P2 <sub>1</sub> /n                                                 | Cmcm                                                                                | I2/a                                                               |
| a/Å                                                                      | 11.7750(9)                                                         | 21.5535(17)                                                                         | 19.8011(5)                                                         |
| b/Å                                                                      | 15.4255(12)                                                        | 21.0599(7)                                                                          | 10.7352(3)                                                         |
| c/Å                                                                      | 12.1047(9)                                                         | 21.3570(14)                                                                         | 21.1945(6)                                                         |
| $\alpha$ /°                                                              | 90                                                                 | 90                                                                                  | 90                                                                 |
| $\beta$ /°                                                               | 104.6390(10)                                                       | 90                                                                                  | 100.5883(13)                                                       |
| $\gamma$ /°                                                              | 90                                                                 | 90                                                                                  | 90                                                                 |
| Volume/Å <sup>3</sup>                                                    | 2127.3(3)                                                          | 9694.3(10)                                                                          | 4428.6(2)                                                          |
| Z                                                                        | 4                                                                  | 8                                                                                   | 8                                                                  |
| $\rho_{\text{calc}}/\text{cm}^3$                                         | 1.883                                                              | 1.540                                                                               | 1.808                                                              |
| $\mu/\text{mm}^{-1}$                                                     | 5.868                                                              | 8.438                                                                               | 11.008                                                             |
| F(000)                                                                   | 1160.0                                                             | 4528.0                                                                              | 2344.0                                                             |
| Crystal size/mm <sup>3</sup>                                             | 0.188 × 0.162 × 0.122                                              | 0.252 × 0.234 × 0.052                                                               | 0.168 × 0.075 × 0.03                                               |
| Radiation                                                                | MoK $\alpha$ ( $\lambda$ = 0.71073)                                | CuK $\alpha$ ( $\lambda$ = 1.54178)                                                 | CuK $\alpha$ ( $\lambda$ = 1.54178)                                |
| 2 $\theta$ range for data collection/°                                   | 4.312 to 55.752                                                    | 5.868 to 133.104                                                                    | 8.488 to 133.152                                                   |
| Index ranges                                                             | -15 ≤ h ≤ 15, -20 ≤ k ≤ 20, -15 ≤ l ≤ 15                           | -13 ≤ h ≤ 25, -25 ≤ k ≤ 24, -25 ≤ l ≤ 23                                            | -23 ≤ h ≤ 23, -12 ≤ k ≤ 12, -25 ≤ l ≤ 25                           |
| Reflections collected                                                    | 25903                                                              | 17382                                                                               | 3809                                                               |

|                                                |                                                                  |                                                                  |                                                                  |
|------------------------------------------------|------------------------------------------------------------------|------------------------------------------------------------------|------------------------------------------------------------------|
| Independent reflections                        | 5077 [ $R_{\text{int}} = 0.0497$ , $R_{\text{sigma}} = 0.0385$ ] | 4426 [ $R_{\text{int}} = 0.0909$ , $R_{\text{sigma}} = 0.0827$ ] | 3809 [ $R_{\text{int}} = 0.0644$ , $R_{\text{sigma}} = 0.0720$ ] |
| Data/restraints/parameters                     | 5077/0/280                                                       | 4426/937/486                                                     | 3809/164/349                                                     |
| Goodness-of-fit on $F^2$                       | 0.717                                                            | 1.026                                                            | 1.064                                                            |
| Final R indexes [ $I \geq 2\sigma(I)$ ]        | $R_1 = 0.0264$ , $wR_2 = 0.0814$                                 | $R_1 = 0.0619$ , $wR_2 = 0.1433$                                 | $R_1 = 0.0360$ , $wR_2 = 0.0843$                                 |
| Final R indexes [all data]                     | $R_1 = 0.0405$ , $wR_2 = 0.0968$                                 | $R_1 = 0.0971$ , $wR_2 = 0.1615$                                 | $R_1 = 0.0395$ , $wR_2 = 0.0866$                                 |
| Largest diff. peak/hole / $e \text{ \AA}^{-3}$ | 1.22/-0.58                                                       | 1.67/-1.34                                                       | 1.50/-0.97                                                       |

| Table 2 Crystal data and structure refinement for compounds <b>7</b> , dearomatized Re complex, <b>3</b> , and <b>9</b> |                                                                    |                                                                     |                                                                        |
|-------------------------------------------------------------------------------------------------------------------------|--------------------------------------------------------------------|---------------------------------------------------------------------|------------------------------------------------------------------------|
| Identification code                                                                                                     | <b>5</b>                                                           | <b>3</b>                                                            | <b>6</b>                                                               |
| Empirical formula                                                                                                       | $\text{C}_{36}\text{H}_{30}\text{N}_5\text{O}_3\text{Re}$          | $\text{C}_{29}\text{H}_{18}\text{D}_6\text{N}_3\text{O}_3\text{Re}$ | $\text{C}_{51}\text{H}_{46}\text{Cl}_2\text{N}_6\text{O}_9\text{Re}_2$ |
| Formula weight                                                                                                          | 766.85                                                             | 654.75                                                              | 1330.24                                                                |
| Temperature/K                                                                                                           | 173.0                                                              | 173.0                                                               | 173                                                                    |
| Crystal system                                                                                                          | monoclinic                                                         | triclinic                                                           | triclinic                                                              |
| Space group                                                                                                             | $P2_1/c$                                                           | $P-1$                                                               | $P-1$                                                                  |
| $a/\text{\AA}$                                                                                                          | 8.8205(8)                                                          | 9.6071(9)                                                           | 10.6487(7)                                                             |
| $b/\text{\AA}$                                                                                                          | 13.4145(12)                                                        | 11.7517(10)                                                         | 14.8830(10)                                                            |
| $c/\text{\AA}$                                                                                                          | 26.571(2)                                                          | 12.1793(11)                                                         | 17.1392(12)                                                            |
| $\alpha/^\circ$                                                                                                         | 90                                                                 | 81.0430(10)                                                         | 73.3670(10)                                                            |
| $\beta/^\circ$                                                                                                          | 91.8983(11)                                                        | 80.2040(10)                                                         | 79.1560(10)                                                            |
| $\gamma/^\circ$                                                                                                         | 90                                                                 | 67.7730(10)                                                         | 76.0790(10)                                                            |
| Volume/ $\text{\AA}^3$                                                                                                  | 3142.3(5)                                                          | 1248.00(19)                                                         | 2505.3(3)                                                              |
| Z                                                                                                                       | 4                                                                  | 2                                                                   | 2                                                                      |
| $\rho_{\text{calc}}/\text{g cm}^{-3}$                                                                                   | 1.621                                                              | 1.742                                                               | 1.763                                                                  |
| $\mu/\text{mm}^{-1}$                                                                                                    | 3.912                                                              | 4.905                                                               | 4.996                                                                  |
| $F(000)$                                                                                                                | 1520.0                                                             | 636.0                                                               | 1300.0                                                                 |
| Crystal size/ $\text{mm}^3$                                                                                             | $0.284 \times 0.228 \times 0.048$                                  | $0.192 \times 0.088 \times 0.054$                                   | $0.207 \times 0.119 \times 0.073$                                      |
| Radiation                                                                                                               | $\text{MoK}\alpha$ ( $\lambda = 0.71073$ )                         | $\text{MoK}\alpha$ ( $\lambda = 0.71073$ )                          | $\text{MoK}\alpha$ ( $\lambda = 0.71073$ )                             |
| $2\theta$ range for data collection/ $^\circ$                                                                           | 3.068 to 58.274                                                    | 3.41 to 56.554                                                      | 2.5 to 55.596                                                          |
| Index ranges                                                                                                            | $-12 \leq h \leq 12$ , $-18 \leq k \leq 18$ , $-36 \leq l \leq 36$ | $-12 \leq h \leq 12$ , $-15 \leq k \leq 15$ , $-16 \leq l \leq 16$  | $-13 \leq h \leq 13$ , $-19 \leq k \leq 19$ , $-22 \leq l \leq 22$     |
| Reflections collected                                                                                                   | 42912                                                              | 18767                                                               | 48489                                                                  |
| Independent reflections                                                                                                 | 8443 [ $R_{\text{int}} = 0.0499$ , $R_{\text{sigma}} = 0.0395$ ]   | 6183 [ $R_{\text{int}} = 0.0395$ , $R_{\text{sigma}} = 0.0437$ ]    | 11853 [ $R_{\text{int}} = 0.0690$ , $R_{\text{sigma}} = 0.0629$ ]      |
| Data/restraints/parameters                                                                                              | 8443/962/531                                                       | 6183/72/361                                                         | 11853/0/639                                                            |
| Goodness-of-fit on $F^2$                                                                                                | 1.041                                                              | 1.019                                                               | 0.998                                                                  |
| Final R indexes [ $I \geq 2\sigma(I)$ ]                                                                                 | $R_1 = 0.0262$ , $wR_2 = 0.0488$                                   | $R_1 = 0.0259$ , $wR_2 = 0.0492$                                    | $R_1 = 0.0330$ , $wR_2 = 0.0556$                                       |

|                                                |                                  |                                  |                                  |
|------------------------------------------------|----------------------------------|----------------------------------|----------------------------------|
| Final R indexes [all data]                     | $R_1 = 0.0388$ , $wR_2 = 0.0519$ | $R_1 = 0.0338$ , $wR_2 = 0.0516$ | $R_1 = 0.0565$ , $wR_2 = 0.0624$ |
| Largest diff. peak/hole / $e \text{ \AA}^{-3}$ | 0.74/-0.52                       | 0.85/-1.04                       | 1.02/-0.80                       |

## References

- (1) Lalancette, J.-M.; Rollin, G.; Dumas, P. Metals Intercalated in Graphite. I. Reduction and Oxidation. *Can. J. Chem.* **1972**, *50* (18), 3058–3062. <https://doi.org/10.1139/v72-485>.
- (2) Tong, L.; Zong, R.; Thummel, R. P. Visible Light-Driven Hydrogen Evolution from Water Catalyzed by A Molecular Cobalt Complex. *J. Am. Chem. Soc.* **2014**, *136* (13), 4881–4884. <https://doi.org/10.1021/ja501257d>.
- (3) LeBlanc, F. A.; Piers, W. E.; Parvez, M. Selective Hydrosilation of CO<sub>2</sub> to a Bis(Silylacetal) Using an Anilido Bipyridyl-Ligated Organoscandium Catalyst. *Angew. Chem.* **2014**, *126* (3), 808–811. <https://doi.org/10.1002/ange.201309094>.
- (4) Smieja, J. M.; Kubiak, C. P. Re(Bipy-TBu)(CO)<sub>3</sub>Cl—improved Catalytic Activity for Reduction of Carbon Dioxide: IR-Spectroelectrochemical and Mechanistic Studies. *Inorg. Chem.* **2010**, *49* (20), 9283–9289. <https://doi.org/10.1021/ic1008363>.
- (5) Bordwell, F. G.; Algrim, D. Nitrogen Acids. 1. Carboxamides and Sulfonamides. *J. Org. Chem.* **1976**, *41* (14), 2507–2508. <https://doi.org/10.1021/jo00876a042>.
- (6) Kolthoff, I. M.; Chantooni, M. K.; Bhowmik, S. Dissociation Constants of Uncharged and Monovalent Cation Acids in Dimethyl Sulfoxide. *J. Am. Chem. Soc.* **1968**, *90* (1), 23–28. <https://doi.org/10.1021/ja01003a005>.
- (7) Crampton, M. R.; Robotham, I. A. Acidities of Some Substituted Ammonium Ions in Dimethyl Sulfoxide†. *J. Chem. Res.* **1997**, No. 1, 22–23. <https://doi.org/10.1039/a606020j>.
- (8) Benoit, R. L.; Lefebvre, D.; Fréchette, M. Basicity of 1,8-Bis(Dimethylamino)Naphthalene and 1,4-Diazabicyclo[2.2.2]Octane in Water and Dimethylsulfoxide. *Can. J. Chem.* **1987**, *65* (5), 996–1001. <https://doi.org/10.1139/v87-170>.
- (9) Bordwell, F. G. Equilibrium Acidities in Dimethyl Sulfoxide Solution. *Acc. Chem. Res.* **1988**, *21* (12), 456–463. <https://doi.org/10.1021/ar00156a004>.
- (10) Maran, F.; Celadon, D.; Severin, M. G.; Vianello, E. Electrochemical Determination of the PK<sub>a</sub> of Weak Acids in N,N-Dimethylformamide. *J. Am. Chem. Soc.* **1991**, *113* (24), 9320–9329. <https://doi.org/10.1021/ja00024a041>.
- (11) Rõõm, E.-I.; Kaljurand, I.; Leito, I.; Rodima, T.; Koppel, I. A.; Vlasov, V. M. Acid–Base Equilibria in Nonpolar Media. 3. Expanding the Spectrophotometric Acidity Scale in Heptane. *J. Org. Chem.* **2003**, *68* (20), 7795–7799. <https://doi.org/10.1021/jo0343477>.
- (12) Leito, I.; Rodima, T.; Koppel, I. A.; Schwesinger, R.; Vlasov, V. M. Acid–Base Equilibria in Nonpolar Media. 1. A Spectrophotometric Method for Acidity Measurements in Heptane. *J. Org. Chem.* **1997**, *62* (24), 8479–8483. <https://doi.org/10.1021/jo9713013>.
- (13) Clark, M. L.; Cheung, P. L.; Lessio, M.; Carter, E. A.; Kubiak, C. P. Kinetic and Mechanistic Effects of Bipyridine (Bpy) Substituent, Labile Ligand, and Brønsted Acid on Electrocatalytic CO<sub>2</sub> Reduction by Re(Bpy) Complexes. *ACS Catal.* **2018**, *8* (3), 2021–2029. <https://doi.org/10.1021/acscatal.7b03971>.
- (14) Warren, J. J.; Tronic, T. A.; Mayer, J. M. Thermochemistry of Proton-Coupled Electron Transfer Reagents and Its Implications. *Chem. Rev.* **2010**, *110* (12), 6961–7001. <https://doi.org/10.1021/cr100085k>.
- (15) Dong, G.; Fang, M.; Wang, H.; Yip, S.; Cheung, H.-Y.; Wang, F.; Wong, C.-Y.; Tak Chu, S.; C. Ho, J. Insight into the Electrochemical Activation of Carbon-Based Cathodes for Hydrogen Evolution Reaction. *J. Mater. Chem. A* **2015**, *3* (24), 13080–13086. <https://doi.org/10.1039/C5TA02551F>.
- (16) Chen, R.; Yang, C.; Cai, W.; Wang, H.-Y.; Miao, J.; Zhang, L.; Chen, S.; Liu, B. Use of Platinum as the Counter Electrode to Study the Activity of Nonprecious Metal Catalysts for the Hydrogen Evolution Reaction. *ACS Energy Lett.* **2017**, *2* (5), 1070–1075. <https://doi.org/10.1021/acsenerylett.7b00219>.
- (17) Jerkiewicz, G. Applicability of Platinum as a Counter-Electrode Material in Electrocatalysis Research. *ACS Catal.* **2022**, *12* (4), 2661–2670. <https://doi.org/10.1021/acscatal.1c06040>.
